# Supplementary material for: Troxerutin-mediated C9 inhibition is a disease-modifying treatment for inflammatory arthritis.
Source: Research Square preprint supplement (doi:10.21203/rs.3.rs-406279/v1), 2021-04-26
Supplement: Supplementary file 1 [file 4551f7588f6d78df8b87d73f.xlsx]

## Sheet: Sheet1
Table S1 - Multiconcensus report with differential expression profile
			115/113	114/113	116/113	Mean of AIA (114/113) & (116/113)	Log2 value of Mean of AIA			Mean of TXR (117/113) & (119/113)	Log2 value of Mean of TXR	Ratio of Mean of AIA by Mean of TXR	Log 2 Ratio of Mean of AIA by Mean of TXR	AIA vs TXR			Mean of DS (118/113) & (121/113)	Log2 of Mean of DS	Ratio of Mean of AIA by Mean of DS	Log 2 Ratio of Mean of AIA by Mean of DS
Accession	Description	Accession	Healthy	AIA 1	AIA 2	Avg	log2	TXR 1	TXR 2	Avg	log2	Ratio	log2	p-values	DS 1	DS 2	Avg	log2	Ratio	log2	p-values
P02770	Serum albumin [OS=Rattus norvegicus]	P02770	1.07088	0.9775	0.998125	0.987812	-0.0176909	0.936625	0.981125	0.958875	-0.0605853	1.03018	0.0428945	0.359344	0.83825	0.813625	0.825937	-0.275895	1.19599	0.258205	0.00970091
P00564	Creatine kinase M-type [OS=Rattus norvegicus]	P00564	1.02475	0.682375	0.618	0.650188	-0.621072	0.615625	0.762625	0.689125	-0.537162	0.943497	-0.0839099	0.675439	0.423125	0.806875	0.615	-0.701342	1.05722	0.0802694	0.873145
P02091	Hemoglobin subunit beta-1 [OS=Rattus norvegicus]	P02091	0.98975	0.852	1.1985	1.02525	0.0359757	1.03737	1.02575	1.03156	0.0448312	0.993881	-0.00885549	0.974259	0.88725	0.846625	0.866937	-0.206	1.18261	0.241976	0.459905
P68136	Actin, alpha skeletal muscle [OS=Rattus norvegicus]	P68136	0.947375	1.2635	1.374	1.31875	0.399171	1.29337	1.19087	1.24212	0.31281	1.06169	0.0863607	0.416243	1.86725	1.14987	1.50856	0.593174	0.874177	-0.194003	0.653132
P05065	fructose-bisphosphate aldolase A [OS=Rattus norvegicus]	P05065	0.960875	1.41775	1.42775	1.42275	0.508682	1.34787	1.53863	1.44325	0.529321	0.985796	-0.020639	0.849941	1.1725	1.70212	1.43731	0.523374	0.989868	-0.0146916	0.961151
P60711	Actin, cytoplasmic 1 [OS=Rattus norvegicus]	P60711	0.89675	1.10662	1.41987	1.26325	0.33714	1.21812	1.12075	1.16944	0.225815	1.08022	0.111325	0.625063	1.49687	1.18063	1.33875	0.420887	0.943604	-0.0837464	0.766746
P15429	Beta-enolase [OS=Rattus norvegicus]	P15429	0.944429	0.757571	0.696286	0.726929	-0.460114	0.706	0.781	0.7435	-0.427595	0.977712	-0.0325191	0.76482	0.680857	0.843429	0.762143	-0.391867	0.953796	-0.0682478	0.724456
P11980-1	Pyruvate kinase PKM [OS=Rattus norvegicus]	P11980-1	1.082	0.659	0.7705	0.71475	-0.484489	0.6275	0.763	0.69525	-0.524396	1.02805	0.0399069	0.844751	0.3975	0.9145	0.656	-0.608232	1.08956	0.123743	0.844809
P11980-2	Isoform M2 of Pyruvate kinase PKM [OS=Rattus norvegicus]	P11980-2	1.00937	0.737875	0.82	0.778938	-0.360421	0.796125	0.823	0.809562	-0.304786	0.962171	-0.0556349	0.551917	0.790125	0.91825	0.854187	-0.227375	0.911905	-0.133045	0.426937
P01946	Hemoglobin subunit alpha-1/2 [OS=Rattus norvegicus]	P01946	1.07862	0.781875	1.054	0.917937	-0.123532	1.04875	0.9605	1.00462	0.00665708	0.913712	-0.130189	0.606107	0.87625	0.816625	0.846437	-0.240525	1.08447	0.116992	0.658811
P31000	Vimentin [OS=Rattus norvegicus]	P31000	0.974875	1.2295	1.51462	1.37206	0.456346	1.27163	1.1255	1.19856	0.261305	1.14476	0.195041	0.391982	1.54725	1.21925	1.38325	0.468062	0.991912	-0.0117157	0.96362
P11517	Hemoglobin subunit beta-2 [OS=Rattus norvegicus]	P11517	0.865125	0.91675	1.2465	1.08162	0.1132	0.984625	1.171	1.07781	0.108106	1.00354	0.00509418	0.985767	1.4585	0.85625	1.15738	0.210856	0.93455	-0.097656	0.845844
P16290	phosphoglycerate mutase 2 [OS=Rattus norvegicus]	P16290	1.0508	0.8518	0.9204	0.8861	-0.174459	0.825	0.9778	0.9014	-0.149761	0.983026	-0.0246979	0.87188	0.7422	0.8994	0.8208	-0.284897	1.07956	0.110439	0.525927
P63018	Heat shock cognate 71 kDa protein [OS=Rattus norvegicus]	P63018	0.959571	0.963571	1.02171	0.992643	-0.0106534	1.04029	0.995286	1.01779	0.0254338	0.975297	-0.0360872	0.564611	1.14743	0.972	1.05971	0.0836753	0.936708	-0.0943287	0.543386
P06761	78 kDa glucose-regulated protein [OS=Rattus norvegicus]	P06761	0.9395	1.03175	1.01075	1.02125	0.0303361	1.05912	1.0455	1.05231	0.0735632	0.970482	-0.0432271	0.131165	1.30663	1.0985	1.20256	0.266112	0.849228	-0.235776	0.225137
P12346-1	Serotransferrin [OS=Rattus norvegicus]	P12346-1	0.9476	1.1896	1.1056	1.1476	0.19862	1.1262	1.1166	1.1214	0.165301	1.02336	0.0333189	0.598607	1.5154	1.066	1.2907	0.368154	0.88913	-0.169534	0.595229
P04692	Tropomyosin alpha-1 chain [OS=Rattus norvegicus]	P04692	1.09775	0.863125	0.985875	0.9245	-0.113255	0.815875	1.06513	0.9405	-0.0885002	0.982988	-0.0247546	0.918827	0.899625	1.27425	1.08694	0.120269	0.850555	-0.233524	0.496525
P85973	purine nucleoside phosphorylase [OS=Rattus norvegicus]	P85973	0.989375	1.07412	1.11825	1.09619	0.132495	1.13938	1.08575	1.11256	0.153886	0.985282	-0.0213918	0.683658	1.50413	1.13525	1.31969	0.400196	0.830642	-0.267702	0.351997
P25113	Phosphoglycerate mutase 1 [OS=Rattus norvegicus]	P25113	0.9338	1.0966	0.8338	0.9652	-0.0511002	1.1366	1.0852	1.1109	0.151729	0.868845	-0.202829	0.390165	1.8172	1.1668	1.492	0.577248	0.646917	-0.628348	0.271948
Q63610-1	Tropomyosin alpha-3 chain [OS=Rattus norvegicus]	Q63610-1	0.986	1.15817	1.247	1.20258	0.266137	1.19517	1.053	1.12408	0.168749	1.06983	0.0973879	0.447862	1.59017	1.0785	1.33433	0.416119	0.901262	-0.149982	0.662296
Q6P6V0	glucose-6-phosphate isomerase [OS=Rattus norvegicus]	Q6P6V0	0.927286	0.862429	0.951	0.906714	-0.14128	0.888571	0.957429	0.923	-0.115597	0.982356	-0.0256826	0.798904	1.06957	0.853429	0.9615	-0.0566412	0.943021	-0.0846388	0.685175
P09495	Tropomyosin alpha-4 chain [OS=Rattus norvegicus]	P09495	0.969429	1.03257	1.11071	1.07164	0.0998242	0.978714	0.971286	0.975	-0.0365259	1.09912	0.13635	0.132842	1.182	1.12629	1.15414	0.206822	0.928518	-0.106998	0.227702
P04764	alpha-enolase [OS=Rattus norvegicus]	P04764	0.911857	0.966	0.873429	0.919714	-0.120742	1.09	1.00729	1.04864	0.0685234	0.877052	-0.189266	0.1734	1.24271	1.11343	1.17807	0.236427	0.780695	-0.357169	0.0830695
P20059	Hemopexin [OS=Rattus norvegicus]	P20059	0.959625	2.54375	1.85975	2.20175	1.13865	2.145	1.57963	1.86231	0.897095	1.18227	0.241555	0.524212	2.23513	1.87312	2.05412	1.03852	1.07187	0.100127	0.739539
P02625	Parvalbumin alpha [OS=Rattus norvegicus]	P02625	1.08412	0.83725	0.584875	0.711063	-0.491952	0.701125	0.839625	0.770375	-0.376367	0.923008	-0.115585	0.72026	0.589375	0.836875	0.713125	-0.487773	0.997108	-0.00417861	0.991749
P02600-1	Myosin light chain 1/3, skeletal muscle isoform [OS=Rattus norvegicus]	P02600-1	0.9875	0.564	0.493	0.5285	-0.920025	0.506	0.928625	0.717312	-0.479326	0.736778	-0.440698	0.471171	0.479	1.11337	0.796187	-0.32882	0.663788	-0.591205	0.489904
P04785	Protein disulfide-isomerase [OS=Rattus norvegicus]	P04785	0.9585	1.3155	1.34787	1.33169	0.413256	1.27487	1.17675	1.22581	0.293738	1.08637	0.119517	0.176957	1.3385	1.23275	1.28563	0.36247	1.03583	0.0507857	0.492479
P10719	ATP synthase subunit beta, mitochondrial [OS=Rattus norvegicus]	P10719	1.0815	0.811625	0.847875	0.82975	-0.269251	0.76575	1.07988	0.922813	-0.115891	0.899153	-0.153361	0.615742	0.86025	1.093	0.976625	-0.0341234	0.84961	-0.235128	0.338613
P04797	glyceraldehyde-3-phosphate dehydrogenase [OS=Rattus norvegicus]	P04797	0.912625	0.675125	0.740875	0.708	-0.498179	0.643625	0.644	0.643813	-0.635288	1.0997	0.137109	0.190132	0.701	0.78675	0.743875	-0.426868	0.951773	-0.0713109	0.574992
P07335	Creatine kinase B-type [OS=Rattus norvegicus]	P07335	1.01588	1.00912	0.891875	0.9505	-0.0732415	0.923375	0.8805	0.901938	-0.148901	1.05384	0.0756592	0.518006	1.1385	0.894875	1.01669	0.0238763	0.934899	-0.0971178	0.672848
P18418	Calreticulin [OS=Rattus norvegicus]	P18418	0.923	1.26137	1.17225	1.21681	0.283107	1.31363	1.12975	1.22169	0.288875	0.99601	-0.00576842	0.966279	1.589	1.27	1.4295	0.515511	0.851215	-0.232404	0.327719
P48500	Triosephosphate isomerase [OS=Rattus norvegicus]	P48500	0.991571	0.814286	0.760429	0.787357	-0.34491	0.816429	0.852429	0.834429	-0.26114	0.943588	-0.0837704	0.283333	0.781	0.868857	0.824929	-0.277659	0.954455	-0.067251	0.541725
P09812	Glycogen phosphorylase, muscle form [OS=Rattus norvegicus]	P09812	1.0745	1.36937	1.41463	1.392	0.477159	1.24162	1.63175	1.43669	0.522746	0.968895	-0.0455871	0.841129	1.16475	1.63312	1.39894	0.484332	0.995041	-0.0071723	0.979154
P07323	Gamma-enolase [OS=Rattus norvegicus]	P07323	0.846333	0.538667	0.503	0.520833	-0.941106	0.583667	0.657	0.620333	-0.688884	0.839602	-0.252222	0.134789	0.466667	0.726	0.596333	-0.745809	0.873393	-0.195297	0.622326
P38652	Phosphoglucomutase-1 [OS=Rattus norvegicus]	P38652	0.960375	0.842125	0.6995	0.770812	-0.375548	0.72825	0.85475	0.7915	-0.337339	0.973863	-0.0382094	0.848312	0.739	0.82325	0.781125	-0.356375	0.986798	-0.0191735	0.912298
P20760	Ig gamma-2A chain C region [OS=Rattus norvegicus]	P20760	1.01457	1.48586	1.58829	1.53707	0.620184	1.20157	1.36271	1.28214	0.358557	1.19883	0.261627	0.116289	1.64914	1.13471	1.39193	0.477085	1.10427	0.143099	0.63558
P50137	Transketolase [OS=Rattus norvegicus]	P50137	0.933	0.918	1.01329	0.965643	-0.0504384	1.13743	1.005	1.07121	0.0992471	0.901447	-0.149685	0.324891	1.14871	1.10843	1.12857	0.174498	0.855633	-0.224936	0.0877305
P48675	desmin [OS=Rattus norvegicus]	P48675	1.047	1.175	1.099	1.137	0.185232	1.223	1.099	1.161	0.215368	0.979328	-0.0301357	0.772734	0.867	0.978	0.9225	-0.116379	1.23252	0.301611	0.085857
P02764	Alpha-1-acid glycoprotein [OS=Rattus norvegicus]	P02764	1.10075	4.515	2.684	3.5995	1.8478	2.42675	3.118	2.77238	1.47112	1.29835	0.376674	0.486973	5.3915	2.99075	4.19112	2.06734	0.858839	-0.219541	0.732952
P01048	T-kininogen 1 [OS=Rattus norvegicus]	P01048	1.10617	3.35417	2.0795	2.71683	1.44193	1.7075	1.45167	1.57958	0.659544	1.71997	0.782382	0.22231	2.15633	1.69133	1.92383	0.943984	1.4122	0.497942	0.362913
P05197	Elongation factor 2 [OS=Rattus norvegicus]	P05197	0.963125	0.960375	1.06138	1.01087	0.0156046	1.06737	0.961	1.01419	0.0203244	0.996734	-0.00471979	0.96808	1.2145	0.933625	1.07406	0.103078	0.94117	-0.0874733	0.713194
P14046	Alpha-1-inhibitor 3 [OS=Rattus norvegicus]	P14046	0.929286	0.983286	1.00586	0.994571	-0.00785311	1.05786	0.995	1.02643	0.0376332	0.968963	-0.0454863	0.440769	1.20457	0.859714	1.03214	0.0456427	0.963599	-0.0534958	0.848041
P04636	Malate dehydrogenase, mitochondrial [OS=Rattus norvegicus]	P04636	0.9886	0.8414	0.8714	0.8564	-0.223643	0.8866	0.9236	0.9051	-0.143851	0.946194	-0.0797924	0.177547	1.0636	1.0098	1.0367	0.0519985	0.826083	-0.275642	0.0279626
P24090	Alpha-2-HS-glycoprotein [OS=Rattus norvegicus]	P24090	1.10775	1.12775	1.07675	1.10225	0.140451	0.95275	1.0215	0.987125	-0.0186953	1.11663	0.159147	0.114882	0.46925	0.8645	0.666875	-0.584512	1.65286	0.724963	0.160507
Q03626-1	Murinoglobulin-1 [OS=Rattus norvegicus]	Q03626-1	0.8895	0.8205	0.8515	0.836	-0.258425	0.931	0.8175	0.87425	-0.193882	0.956248	-0.0645429	0.582277	0.9655	0.8315	0.8985	-0.15441	0.93044	-0.104016	0.459371
P01835	Ig kappa chain C region, B allele [OS=Rattus norvegicus]	P01835	1.00114	1.22086	1.28157	1.25121	0.323329	1.22486	1.15571	1.19029	0.251308	1.05119	0.072021	0.316477	1.48486	1.03871	1.26179	0.335467	0.991622	-0.012138	0.966814
P09605	Creatine kinase S-type, mitochondrial [OS=Rattus norvegicus]	P09605	1.0294	0.6866	0.6834	0.685	-0.545824	0.7374	0.8584	0.7979	-0.32572	0.858504	-0.220104	0.20311	0.7578	0.9274	0.8426	-0.24708	0.81296	-0.298744	0.204253
Q5XI73	rho GDP-dissociation inhibitor 1 [OS=Rattus norvegicus]	Q5XI73	0.973429	1.09157	1.01443	1.053	0.0745054	1.13971	1.09457	1.11714	0.159814	0.942583	-0.0853082	0.287686	1.72329	1.14714	1.43521	0.521266	0.733688	-0.446761	0.319029
P14141	carbonic anhydrase 3 [OS=Rattus norvegicus]	P14141	0.981429	0.696143	0.522	0.609071	-0.715317	0.961857	0.803571	0.882714	-0.179982	0.689998	-0.535335	0.145578	0.654857	0.643	0.648929	-0.623868	0.93858	-0.0914483	0.692696
Q9R063-1	Peroxiredoxin-5, mitochondrial [OS=Rattus norvegicus]	Q9R063-1	0.982429	1.35771	1.00657	1.18214	0.241404	1.54529	1.16714	1.35621	0.439585	0.871649	-0.198181	0.569434	1.72914	1.71486	1.722	0.784085	0.686494	-0.542681	0.091616
A7VJC2-1	heterogeneous nuclear ribonucleoproteins A2/B1 [OS=Rattus norvegicus]	A7VJC2-1	0.971571	0.960429	1.03757	0.999	-0.00144342	1.06629	0.957	1.01164	0.0167001	0.987503	-0.0181435	0.867516	1.19443	1.00014	1.09729	0.133939	0.910428	-0.135383	0.446301
P19804	nucleoside diphosphate kinase b [OS=Rattus norvegicus]	P19804	0.86225	1.07587	1.02212	1.049	0.0690147	0.940375	0.866	0.903188	-0.146903	1.16144	0.215917	0.0863785	1.03587	0.9195	0.977688	-0.0325547	1.07294	0.101569	0.381679
Q63041	Alpha-1-macroglobulin [OS=Rattus norvegicus]	Q63041	1.04075	1.71725	1.93925	1.82825	0.870463	1.4485	1.223	1.33575	0.41765	1.36871	0.452813	0.0895592	1.694	1.15375	1.42388	0.509822	1.284	0.360641	0.300402
P16617	phosphoglycerate kinase 1 [OS=Rattus norvegicus]	P16617	0.952143	0.797286	0.741857	0.769571	-0.377873	0.800857	0.815714	0.808286	-0.307063	0.952103	-0.0708101	0.309704	1.01457	0.809286	0.911929	-0.133007	0.843894	-0.244866	0.312475
P05545	Serine protease inhibitor A3K [OS=Rattus norvegicus]	P05545	1.01062	0.8865	0.886125	0.886312	-0.174113	0.746125	0.92175	0.833937	-0.261989	1.0628	0.0878762	0.6114	1.1995	0.77425	0.986875	-0.0190607	0.8981	-0.155052	0.682835
P70623	Fatty acid-binding protein, adipocyte [OS=Rattus norvegicus]	P70623	0.996	0.667667	0.78	0.723833	-0.466271	0.742333	0.841333	0.791833	-0.336731	0.914123	-0.129539	0.459602	0.812	0.713	0.7625	-0.391191	0.94929	-0.0750798	0.656957
P61980	Heterogeneous nuclear ribonucleoprotein K [OS=Rattus norvegicus]	P61980	1.06217	1.04833	0.968	1.00817	0.0117342	1.0515	1.26317	1.15733	0.210804	0.871112	-0.19907	0.318289	1.41433	0.981167	1.19775	0.260327	0.841717	-0.248593	0.480125
P06866-2	Isoform 2 of Haptoglobin [OS=Rattus norvegicus]	P06866-2	1.1165	2.136	1.8935	2.01475	1.0106	1.84	1.412	1.626	0.701327	1.23908	0.309274	0.254773	2.453	1.819	2.136	1.09491	0.943235	-0.0843108	0.755079
P62630	Elongation factor 1-alpha 1 [OS=Rattus norvegicus]	P62630	1.0065	1.17075	1.194	1.18237	0.241688	1.16525	1.0485	1.10688	0.146492	1.06821	0.0951954	0.332298	1.56725	1.06475	1.316	0.396159	0.898461	-0.154472	0.64833
P62632	Elongation factor 1-alpha 2 [OS=Rattus norvegicus]	P62632	1.043	1.359	1.379	1.369	0.453122	1.247	1.079	1.163	0.217851	1.17713	0.235271	0.135247	1.631	1.268	1.4495	0.535555	0.944464	-0.0824329	0.701164
P05964	protein S100-A6 [OS=Rattus norvegicus]	P05964	1.1016	1.2028	1.2254	1.2141	0.279887	1.4	1.301	1.3505	0.433494	0.899	-0.153606	0.115122	1.3342	1.3404	1.3373	0.419323	0.907874	-0.139436	0.00892493
P04256	Heterogeneous nuclear ribonucleoprotein A1 [OS=Rattus norvegicus]	P04256	0.985	1.035	1.088	1.0615	0.0861044	0.986	0.914	0.95	-0.0740006	1.11737	0.160105	0.130093	0.992	0.949	0.9705	-0.0431999	1.09377	0.129304	0.116546
P07943	aldose reductase [OS=Rattus norvegicus]	P07943	1.01	1.02433	0.904667	0.9645	-0.0521469	0.979667	0.991	0.985333	-0.0213162	0.978857	-0.0308306	0.761934	1.29967	1.038	1.16883	0.225069	0.825182	-0.277216	0.291375
Q5XFX0	Transgelin-2 [OS=Rattus norvegicus]	Q5XFX0	1.0045	1.1785	1.26025	1.21937	0.286142	1.17925	1.15	1.16463	0.219865	1.04701	0.0662764	0.334436	1.4725	1.19625	1.33438	0.416164	0.913817	-0.130022	0.508401
O35244	Peroxiredoxin-6 [OS=Rattus norvegicus]	O35244	1.12583	1.18	1.191	1.1855	0.245496	1.081	1.16767	1.12433	0.16907	1.0544	0.0764258	0.296399	1.13283	1.01733	1.07508	0.104448	1.10271	0.141047	0.197313
P10111	peptidyl-prolyl cis-trans isomerase A [OS=Rattus norvegicus]	P10111	0.945375	0.95575	0.850625	0.903188	-0.146903	1.07225	0.947375	1.00981	0.0140874	0.894411	-0.16099	0.321443	1.28025	0.974625	1.12744	0.173047	0.801098	-0.31995	0.299619
Q9ER34	Aconitate hydratase, mitochondrial [OS=Rattus norvegicus]	Q9ER34	0.912333	0.741667	0.783167	0.762417	-0.391348	0.793	0.839667	0.816333	-0.29277	0.933953	-0.0985787	0.226364	0.886167	0.931	0.908583	-0.138309	0.839127	-0.253039	0.0410057
P56574	Isocitrate dehydrogenase [NADP], mitochondrial [OS=Rattus norvegicus]	P56574	0.908167	0.787833	0.720667	0.75425	-0.406885	0.880833	0.912167	0.8965	-0.157625	0.841327	-0.249261	0.061656	0.979833	0.913	0.946417	-0.0794526	0.796953	-0.327433	0.0557462
P34058	Heat shock protein HSP 90-beta [OS=Rattus norvegicus]	P34058	0.92475	1.51075	1.6835	1.59712	0.675477	1.74687	1.24912	1.498	0.583038	1.06617	0.0924396	0.742879	1.84813	1.23362	1.54087	0.62375	1.03651	0.0517274	0.876333
O35763	Moesin [OS=Rattus norvegicus]	O35763	1.20575	1.7285	1.6135	1.671	0.740712	1.36225	1.32625	1.34425	0.426801	1.24307	0.31391	0.0323606	1.86025	1.50825	1.68425	0.752106	0.992133	-0.0113946	0.949463
P08932	T-kininogen 2 [OS=Rattus norvegicus]	P08932	1.09675	2.85875	2.066	2.46237	1.30005	1.513	1.391	1.452	0.538041	1.69585	0.762009	0.12799	2.1485	1.488	1.81825	0.862551	1.35426	0.4375	0.338184
P82995	Heat shock protein HSP 90-alpha [OS=Rattus norvegicus]	P82995	1.0005	1.2115	1.3025	1.257	0.329985	1.371	1.0795	1.22525	0.293076	1.02591	0.0369085	0.854527	1.466	1.0375	1.25175	0.323946	1.00419	0.00603819	0.983053
P50430	arylsulfatase B [OS=Rattus norvegicus]	P50430	0.8825	0.73825	0.8605	0.799375	-0.323056	0.7625	0.8365	0.7995	-0.32283	0.999844	-0.00022558	0.998763	1.0755	0.75925	0.917375	-0.124417	0.871372	-0.198639	0.558407
P11884	Aldehyde dehydrogenase, mitochondrial [OS=Rattus norvegicus]	P11884	1.07175	0.991	0.97075	0.980875	-0.0278588	1.04225	1.0345	1.03837	0.0543276	0.944625	-0.0821864	0.0337584	1.192	1.04975	1.12088	0.164625	0.875098	-0.192484	0.190664
Q9EQS0	Transaldolase [OS=Rattus norvegicus]	Q9EQS0	0.8912	0.9216	0.9534	0.9375	-0.0931094	1.0694	0.9658	1.0176	0.0251706	0.921285	-0.11828	0.277413	1.0302	1.0002	1.0152	0.021764	0.923463	-0.114873	0.0708367
P20759	Ig gamma-1 chain C region [OS=Rattus norvegicus]	P20759	0.9945	1.8755	1.971	1.92325	0.943546	1.8115	1.2765	1.544	0.626673	1.24563	0.316874	0.297569	1.9385	1.126	1.53225	0.615652	1.25518	0.327895	0.440009
P05544	Serine protease inhibitor A3L [OS=Rattus norvegicus]	P05544	1.08575	0.843125	0.8035	0.823313	-0.280488	0.711	0.919125	0.815063	-0.295017	1.01012	0.0145294	0.945014	0.961625	0.787125	0.874375	-0.193676	0.941601	-0.086812	0.625768
Q63716	peroxiredoxin-1 [OS=Rattus norvegicus]	Q63716	0.9745	1.154	1.1225	1.13825	0.186817	1.22	1.069	1.1445	0.194717	0.994539	-0.0079	0.942792	1.7015	1.217	1.45925	0.545227	0.780024	-0.35841	0.317032
P07483	Fatty acid-binding protein, heart [OS=Rattus norvegicus]	P07483	1.17033	0.921	0.687	0.804	-0.314733	0.791	1.08633	0.938667	-0.0913152	0.856534	-0.223417	0.548911	0.814667	0.833667	0.824167	-0.278992	0.975531	-0.0357406	0.879404
P62982	Ubiquitin-40S ribosomal protein S27a [OS=Rattus norvegicus]	P62982	0.912667	1.242	0.929	1.0855	0.11836	1.01367	1.43033	1.222	0.289244	0.888298	-0.170885	0.652641	2.338	1.02733	1.68267	0.750749	0.645107	-0.63239	0.468953
P39069	Adenylate kinase isoenzyme 1 [OS=Rattus norvegicus]	P39069	0.922857	1.02543	1.23243	1.12893	0.174954	0.817571	0.796571	0.807071	-0.309232	1.3988	0.484186	0.090512	0.619571	0.670286	0.644929	-0.632789	1.75047	0.807743	0.0452116
O88989	Malate dehydrogenase, cytoplasmic [OS=Rattus norvegicus]	O88989	0.9476	0.822	0.7642	0.7931	-0.334425	0.8058	0.8602	0.833	-0.263612	0.952101	-0.0708137	0.420589	0.9396	0.9072	0.9234	-0.114972	0.858891	-0.219453	0.0589884
P51886	Lumican [OS=Rattus norvegicus]	P51886	0.990333	1.228	1.24433	1.23617	0.305873	1.146	1.09667	1.12133	0.165215	1.10241	0.140658	0.0475741	1.56133	1.14867	1.355	0.438293	0.9123	-0.13242	0.623086
P13221	Aspartate aminotransferase, cytoplasmic [OS=Rattus norvegicus]	P13221	1.02975	0.79975	0.719	0.759375	-0.397116	0.7945	0.8755	0.835	-0.260152	0.909431	-0.136964	0.316999	0.91075	0.89275	0.90175	-0.149201	0.842113	-0.247915	0.0750369
Q5U300	Ubiquitin-like modifier-activating enzyme 1 [OS=Rattus norvegicus]	Q5U300	1.05867	1.266	1.30467	1.28533	0.362143	1.186	1.179	1.1825	0.24184	1.08696	0.120302	0.0346207	1.87933	1.167	1.52317	0.607074	0.843856	-0.244931	0.573541
Q5M7U6	Actin-related protein 2 [OS=Rattus norvegicus]	Q5M7U6	0.9845	1.5915	1.602	1.59675	0.675138	1.616	1.3015	1.45875	0.544733	1.0946	0.130406	0.472938	2.4425	1.522	1.98225	0.987139	0.805524	-0.312	0.490431
P27768	Troponin I, fast skeletal muscle [OS=Rattus norvegicus]	P27768	0.9765	0.772	0.700667	0.736333	-0.441569	0.780167	1.02133	0.90075	-0.150801	0.817467	-0.290768	0.321135	0.753167	1.19383	0.9735	-0.0387471	0.756377	-0.402822	0.39931
P04642	L-lactate dehydrogenase A chain [OS=Rattus norvegicus]	P04642	1.0444	1.4294	1.4824	1.4559	0.541911	1.2938	1.2428	1.2683	0.342896	1.14791	0.199015	0.0363478	1.4146	1.3914	1.403	0.488515	1.0377	0.0533963	0.208951
P01026	Complement C3 [OS=Rattus norvegicus]	P01026	0.995	1.39729	1.42657	1.41193	0.497667	1.26843	1.16157	1.215	0.280956	1.16208	0.216711	0.0708331	1.69114	1.16786	1.4295	0.515511	0.987708	-0.0178435	0.952639
P63102	14-3-3 protein zeta/delta [OS=Rattus norvegicus]	P63102	1.02633	1.353	1.342	1.3475	0.430285	1.37167	1.19333	1.2825	0.358959	1.05068	0.0713264	0.542514	1.67733	1.33533	1.50633	0.591041	0.894556	-0.160756	0.451224
Q66H30	Gypsy retrotransposon integrase-like protein 1 [OS=Rattus norvegicus]	Q66H30	0.857	1.721	0.547	1.134	0.181421	0.5395	1.196	0.86775	-0.204649	1.30683	0.386069	0.73043	0.7015	0.803	0.75225	-0.410716	1.50748	0.592137	0.583482
O35567	bifunctional purine biosynthesis protein purH [OS=Rattus norvegicus]	O35567	0.981	1.13075	1.14475	1.13775	0.186184	1.10675	1.1055	1.10613	0.145514	1.02859	0.0406692	0.0460027	1.64775	1.1265	1.38712	0.472098	0.820222	-0.285914	0.439765
P22985	Xanthine dehydrogenase/oxidase [OS=Rattus norvegicus]	P22985	0.991571	1.12357	1.12529	1.12443	0.169192	1.14529	1.04529	1.09529	0.131307	1.02661	0.0378848	0.619004	1.29186	1.06286	1.17736	0.235552	0.955045	-0.06636	0.689318
P19356-1	porphobilinogen deaminase [OS=Rattus norvegicus]	P19356-1	1.09843	0.926714	0.772286	0.8495	-0.235314	0.898857	0.895857	0.897357	-0.156246	0.946669	-0.0790683	0.598659	0.944143	0.841429	0.892786	-0.163614	0.951516	-0.0717	0.68657
P62963	profilin-1 [OS=Rattus norvegicus]	P62963	0.985	1.10183	0.874667	0.98825	-0.017052	1.1095	1.06933	1.08942	0.123556	0.907137	-0.140608	0.472945	1.46867	1.13933	1.304	0.382944	0.75786	-0.399996	0.255213
P27139	Carbonic anhydrase 2 [OS=Rattus norvegicus]	P27139	0.9486	0.705	0.8116	0.7583	-0.399159	0.8574	0.8314	0.8444	-0.244002	0.898034	-0.155158	0.257123	0.988	0.6966	0.8423	-0.247594	0.900273	-0.151565	0.642455
Q794E4	Heterogeneous nuclear ribonucleoprotein F [OS=Rattus norvegicus]	Q794E4	1.006	0.989	0.9038	0.9464	-0.079478	1.0462	1.008	1.0271	0.0385767	0.921429	-0.118055	0.226026	1.0662	0.9658	1.016	0.0229004	0.931496	-0.102378	0.401284
Q6AY09	heterogeneous nuclear ribonucleoprotein H2 [OS=Rattus norvegicus]	Q6AY09	1.02	1.2	1.278	1.239	0.309176	1.135	1.104	1.1195	0.162855	1.10674	0.146322	0.104379	1.751	1.215	1.483	0.568519	0.835469	-0.259342	0.462698
P85108	Tubulin beta-2A chain [OS=Rattus norvegicus]	P85108	0.9675	1.111	1.28683	1.19892	0.261731	1.159	1.00833	1.08367	0.115921	1.10635	0.14581	0.424408	1.1735	0.978	1.07575	0.105343	1.11449	0.156389	0.447738
Q9QZ76	Myoglobin [OS=Rattus norvegicus]	Q9QZ76	0.990429	0.621714	0.534857	0.578286	-0.790146	0.735286	0.785143	0.760214	-0.395522	0.760688	-0.394624	0.0681096	0.426857	0.718429	0.572643	-0.804292	1.00985	0.0141468	0.97378
Q9EPB1	Dipeptidyl peptidase 2 [OS=Rattus norvegicus]	Q9EPB1	0.94625	1.16425	1.205	1.18463	0.24443	1.09325	1.05825	1.07575	0.105343	1.10121	0.139088	0.0558114	1.265	0.995	1.13	0.176323	1.04834	0.0681077	0.727772
Q9QXQ0	Alpha-actinin-4 [OS=Rattus norvegicus]	Q9QXQ0	1.0366	1.401	1.6968	1.5489	0.631244	1.4076	1.3826	1.3951	0.480369	1.11024	0.150875	0.408967	2.0188	1.311	1.6649	0.735436	0.930326	-0.104192	0.790879
Q6P6R2	Dihydrolipoyl dehydrogenase, mitochondrial [OS=Rattus norvegicus]	Q6P6R2	0.914571	0.773429	0.800286	0.786857	-0.345826	0.917429	0.868143	0.892786	-0.163614	0.881351	-0.182212	0.063571	0.972	0.935571	0.953786	-0.0682629	0.824983	-0.277563	0.0178861
Q9Z1P2	Alpha-actinin-1 [OS=Rattus norvegicus]	Q9Z1P2	1.358	0.897	0.985	0.941	-0.0877334	1.023	1.083	1.053	0.0745054	0.893637	-0.162239	0.170165	1.093	1.003	1.048	0.0676387	0.897901	-0.155372	0.23121
Q62930	complement component C9 [OS=Rattus norvegicus]	Q62930	0.961833	2.42717	2.5165	2.47183	1.30558	1.52433	1.37233	1.44833	0.534394	1.70667	0.771188	0.00733679	1.971	1.4365	1.70375	0.768714	1.45082	0.536868	0.105177
P08010	Glutathione S-transferase Mu 2 [OS=Rattus norvegicus]	P08010	0.983	1.00617	1.21583	1.111	0.151859	0.885333	1.0295	0.957417	-0.0627812	1.16041	0.21464	0.350759	1.15967	0.951167	1.05542	0.0778127	1.05266	0.0740461	0.743083
P04041	Glutathione peroxidase 1 [OS=Rattus norvegicus]	P04041	1.0215	1.046	1.1055	1.07575	0.105343	1.11625	1.0965	1.10637	0.14584	0.97232	-0.0404976	0.431607	1.65275	1.187	1.41988	0.505764	0.757637	-0.400421	0.28034
Q68FR6	elongation factor 1-gamma [OS=Rattus norvegicus]	Q68FR6	0.964667	1.43033	1.68933	1.55983	0.641392	1.60067	1.15533	1.378	0.462576	1.13195	0.178816	0.553392	1.89667	1.35367	1.62517	0.700588	0.959799	-0.0591958	0.848197
B0BNA5	coactosin-like protein [OS=Rattus norvegicus]	B0BNA5	1.0586	1.4026	1.4328	1.4177	0.503552	1.5158	1.4306	1.4732	0.558953	0.962327	-0.055401	0.344367	2.1024	1.5396	1.821	0.864731	0.778528	-0.361179	0.288701
P30349	leukotriene A-4 hydrolase [OS=Rattus norvegicus]	P30349	0.999	0.9934	1.0466	1.02	0.0285692	1.0808	1.1242	1.1025	0.140779	0.92517	-0.11221	0.13815	1.4508	1.006	1.2284	0.29678	0.830348	-0.268211	0.450377
P80067	Dipeptidyl peptidase 1 [OS=Rattus norvegicus]	P80067	0.936	1.631	1.499	1.565	0.646163	1.6595	1.392	1.52575	0.609519	1.02573	0.0366441	0.817057	2.497	1.7475	2.12225	1.08559	0.737425	-0.439432	0.280662
P00507	Aspartate aminotransferase, mitochondrial [OS=Rattus norvegicus]	P00507	1.001	0.869833	0.879	0.874417	-0.193607	0.935167	0.952333	0.94375	-0.0835234	0.926534	-0.110084	0.0191316	1.07883	0.977333	1.02808	0.0399572	0.850531	-0.233564	0.0946142
P97532	3-mercaptopyruvate sulfurtransferase [OS=Rattus norvegicus]	P97532	0.967333	0.921333	1.04317	0.98225	-0.0258378	0.9445	0.950167	0.947333	-0.0780559	1.03686	0.0522181	0.624727	1.01533	0.897	0.956167	-0.064666	1.02728	0.0388282	0.78776
Q68FP1	Gelsolin [OS=Rattus norvegicus]	Q68FP1	0.937	0.9306	0.9656	0.9481	-0.0768889	0.938	0.8966	0.9173	-0.124534	1.03358	0.0476456	0.373658	1.2544	0.816	1.0352	0.0499095	0.915862	-0.126798	0.730298
P04276	vitamin D-binding protein [OS=Rattus norvegicus]	P04276	1.05133	1.323	1.17017	1.24658	0.317979	1.0085	0.982	0.99525	-0.00686913	1.25253	0.324848	0.0834726	1.13633	1.01217	1.07425	0.10333	1.16042	0.21465	0.222162
P61983	14-3-3 protein gamma [OS=Rattus norvegicus]	P61983	0.991	1.607	1.754	1.6805	0.748891	1.76	1.415	1.5875	0.666757	1.05858	0.082134	0.66905	1.733	1.535	1.634	0.708408	1.02846	0.0404826	0.742337
P85972	Vinculin [OS=Rattus norvegicus]	P85972	1.0225	1.16517	1.2355	1.20033	0.263435	1.238	1.17117	1.20458	0.268534	0.996472	-0.0050991	0.93817	1.37833	1.02317	1.20075	0.263936	0.999653	-0.00050071	0.998373
Q5I0D5	Phospholysine phosphohistidine inorganic pyrophosphate phosphatase [OS=Rattus norvegicus]	Q5I0D5	1.262	1.267	0.999	1.133	0.180148	1.032	1.126	1.079	0.109695	1.05005	0.070453	0.740331	1.366	1.067	1.2165	0.282736	0.93136	-0.102588	0.717855
Q66HD0-1	Endoplasmin [OS=Rattus norvegicus]	Q66HD0-1	0.98725	1.66625	1.545	1.60562	0.683135	1.442	1.2225	1.33225	0.413865	1.2052	0.26927	0.161027	2.08125	1.432	1.75663	0.812806	0.91404	-0.129671	0.692358
Q6P9V9	Tubulin alpha-1B chain [OS=Rattus norvegicus]	Q6P9V9	1.0472	1.44	1.8276	1.6338	0.708231	1.451	1.181	1.316	0.396159	1.24149	0.312072	0.310698	2.0466	1.1252	1.5859	0.665302	1.0302	0.0429296	0.932388
Q9EPH8	Polyadenylate-binding protein 1 [OS=Rattus norvegicus]	Q9EPH8	1.0175	1.001	1.06333	1.03217	0.0456759	1.16383	1.04917	1.1065	0.146003	0.932821	-0.100328	0.372715	1.4455	1.058	1.25175	0.323946	0.824579	-0.278271	0.379514
Q6URK4	Heterogeneous nuclear ribonucleoprotein A3 [OS=Rattus norvegicus]	Q6URK4	1.08467	1.0845	1.2755	1.18	0.238787	1.14117	1.06467	1.10292	0.141324	1.06989	0.0974631	0.531827	1.00883	1.117	1.06292	0.0880285	1.11015	0.150758	0.39778
P62260	14-3-3 protein epsilon [OS=Rattus norvegicus]	P62260	0.984	1.078	0.894	0.986	-0.0203404	0.971	1.005	0.988	-0.0174171	0.997976	-0.0029234	0.984886	1.034	1.006	1.02	0.0285692	0.966667	-0.0489096	0.749865
P11598	Protein disulfide-isomerase A3 [OS=Rattus norvegicus]	P11598	0.9275	1.632	1.59925	1.61563	0.692092	1.46175	1.32725	1.3945	0.479748	1.15857	0.212344	0.0855861	2.228	1.68125	1.95463	0.966892	0.826565	-0.274799	0.341375
P32362	Uroporphyrinogen decarboxylase [OS=Rattus norvegicus]	P32362	1.20875	0.893	1.08975	0.991375	-0.0124972	0.89375	1.12425	1.009	0.0129262	0.982532	-0.0254234	0.918029	0.90025	0.91675	0.9085	-0.138442	1.09122	0.125944	0.48955
P47942	Dihydropyrimidinase-related protein 2 [OS=Rattus norvegicus]	P47942	1.0028	0.9626	1.053	1.0078	0.0112094	0.9374	0.9666	0.952	-0.0709665	1.05861	0.0821759	0.361024	1.1582	0.9812	1.0697	0.0972062	0.942133	-0.0859969	0.596913
B0BNN3	carbonic anhydrase 1 [OS=Rattus norvegicus]	B0BNN3	0.981	0.8075	0.7115	0.7595	-0.396878	0.873	0.897	0.885	-0.176251	0.858192	-0.220627	0.12658	1.1545	0.783	0.96875	-0.0458037	0.784	-0.351074	0.389294
P20761	Ig gamma-2b chain C region [OS=Rattus norvegicus]	P20761	0.992	1.7295	1.5285	1.629	0.703987	1.219	1.2745	1.24675	0.318172	1.3066	0.385814	0.0670047	1.4875	1.101	1.29425	0.372116	1.25864	0.33187	0.264151
P63039	60 kDa heat shock protein, mitochondrial [OS=Rattus norvegicus]	P63039	0.99675	0.9295	0.94425	0.936875	-0.0940715	0.95175	0.98975	0.97075	-0.0428283	0.965104	-0.0512432	0.238388	1.33825	1.06975	1.204	0.267835	0.778135	-0.361907	0.185317
P46462	Transitional endoplasmic reticulum ATPase [OS=Rattus norvegicus]	P46462	0.95	1.16125	1.26625	1.21375	0.279471	1.191	1.19975	1.19537	0.257463	1.01537	0.022008	0.760543	1.6935	1.246	1.46975	0.555571	0.825821	-0.276099	0.381246
P30427-1	plectin [OS=Rattus norvegicus]	P30427-1	0.963	1.129	1.145	1.137	0.185232	1.134	1.0955	1.11475	0.15672	1.01996	0.0285121	0.397589	1.414	1.0315	1.22275	0.290129	0.929871	-0.104897	0.698023
P50399	Rab GDP dissociation inhibitor beta [OS=Rattus norvegicus]	P50399	0.992667	1.28983	1.3405	1.31517	0.395246	1.32233	1.12067	1.2215	0.288654	1.07668	0.106592	0.462711	1.43467	1.177	1.30583	0.384971	1.00715	0.0102749	0.949801
P09811	Glycogen phosphorylase, liver form [OS=Rattus norvegicus]	P09811	0.964333	1.111	1.21767	1.16433	0.219504	1.19967	1.26967	1.23467	0.304122	0.943035	-0.0846175	0.385158	1.31867	1.18367	1.25117	0.323274	0.930598	-0.10377	0.41906
P26772	10 kDa heat shock protein, mitochondrial [OS=Rattus norvegicus]	P26772	0.93	1.01571	1.09257	1.05414	0.0760704	1.07086	0.956286	1.01357	0.0194478	1.04003	0.0566226	0.616001	1.17829	1.04257	1.11043	0.151117	0.949312	-0.0750462	0.545413
P04906	Glutathione S-transferase P [OS=Rattus norvegicus]	P04906	0.9722	0.964	0.6602	0.8121	-0.300271	0.943	1.0648	1.0039	0.00561557	0.808945	-0.305886	0.361914	1.1764	0.8054	0.9909	-0.0131886	0.819558	-0.287082	0.533554
P08934-1	kininogen-1 [OS=Rattus norvegicus]	P08934-1	1.091	1.421	1.267	1.344	0.426533	1.287	1.17	1.2285	0.296898	1.09402	0.129635	0.354766	0.95	1.172	1.061	0.0854247	1.26673	0.341108	0.171185
P38983	40S ribosomal protein SA [OS=Rattus norvegicus]	P38983	1.0075	1.081	1.1805	1.13075	0.17728	1.1485	0.97125	1.05987	0.0838941	1.06687	0.0933859	0.55774	1.238	1.06175	1.14987	0.201477	0.983368	-0.024197	0.867544
P20069	Mitochondrial-processing peptidase subunit alpha [OS=Rattus norvegicus]	P20069	0.952	0.791	0.846333	0.818667	-0.288652	0.842	1.013	0.9275	-0.108581	0.882659	-0.180071	0.34955	1.03333	0.935333	0.984333	-0.0227811	0.831697	-0.265871	0.0986031
O35077	Glycerol-3-phosphate dehydrogenase [NAD(+)], cytoplasmic [OS=Rattus norvegicus]	O35077	0.994333	1.044	1.061	1.0525	0.0738202	0.97	1.05833	1.01417	0.0202948	1.0378	0.0535255	0.483829	1.07933	1.01533	1.04733	0.0667207	1.00493	0.00709955	0.890317
Q64119-2	Myosin light polypeptide 6 [OS=Rattus norvegicus]	Q64119-2	0.935667	0.932333	0.844333	0.888333	-0.170827	0.911667	1.06467	0.988167	-0.0171737	0.898971	-0.153653	0.375346	1.312	1.16667	1.23933	0.309564	0.716783	-0.480391	0.0538836
Q6P6Q2	keratin, type II cytoskeletal 5 [OS=Rattus norvegicus]	Q6P6Q2	0.441	0.489	0.497	0.493	-1.02034	0.707	0.68	0.6935	-0.528032	0.710887	-0.492308	0.00489538	0.728	0.915	0.8215	-0.283668	0.600122	-0.736673	0.0724511
P07150	annexin A1 [OS=Rattus norvegicus]	P07150	1.09633	1.22833	1.27967	1.254	0.326537	1.387	1.39767	1.39233	0.477505	0.900646	-0.150967	0.0340875	1.71333	1.376	1.54467	0.627296	0.811826	-0.300758	0.230549
P62161	Calmodulin [OS=Rattus norvegicus]	P62161	1.0018	1.0686	0.8374	0.953	-0.0694519	1.0454	1.113	1.0792	0.109962	0.883062	-0.179414	0.404678	1.3116	1.102	1.2068	0.271187	0.789692	-0.340638	0.245349
P07632	Superoxide dismutase [Cu-Zn] [OS=Rattus norvegicus]	P07632	1.00833	0.838667	0.652	0.745333	-0.424042	0.848333	0.993	0.920667	-0.119249	0.809558	-0.304793	0.27588	1.325	0.881667	1.10333	0.141869	0.675529	-0.565911	0.27504
P47858	ATP-dependent 6-phosphofructokinase, muscle type [OS=Rattus norvegicus]	P47858	1.0325	1.3105	1.2845	1.2975	0.375735	1.2825	1.32525	1.30388	0.382806	0.995111	-0.00707103	0.822672	1.41825	1.3505	1.38437	0.469235	0.937246	-0.0935003	0.138977
P36972	Adenine phosphoribosyltransferase [OS=Rattus norvegicus]	P36972	0.951	1.252	1.3145	1.28325	0.359802	1.244	1.1505	1.19725	0.259724	1.07183	0.100078	0.265795	1.409	1.0835	1.24625	0.317594	1.02969	0.0422088	0.84406
P17475	Alpha-1-antiproteinase [OS=Rattus norvegicus]	P17475	1.0285	1.6635	1.6965	1.68	0.748461	1.104	0.9875	1.04575	0.064538	1.6065	0.683923	0.00898884	1.364	1.177	1.2705	0.345396	1.32231	0.403065	0.0497772
P50398	Rab GDP dissociation inhibitor alpha [OS=Rattus norvegicus]	P50398	0.974	1.01175	0.99825	1.005	0.0071955	1.04825	0.94225	0.99525	-0.00686913	1.0098	0.0140646	0.872022	0.90275	1.00075	0.95175	-0.0713454	1.05595	0.0785409	0.394287
P04182	Ornithine aminotransferase, mitochondrial [OS=Rattus norvegicus]	P04182	0.980167	0.890333	0.909167	0.89975	-0.152404	0.91	0.898	0.904	-0.145605	0.995299	-0.00679858	0.74011	1.08383	0.899667	0.99175	-0.0119516	0.907235	-0.140452	0.424999
Q9WU49	Calcium-regulated heat stable protein 1 [OS=Rattus norvegicus]	Q9WU49	0.955	1.1035	0.9455	1.0245	0.03492	0.9985	1.0615	1.03	0.0426443	0.99466	-0.00772435	0.95432	1.668	1.0065	1.33725	0.419269	0.766125	-0.384349	0.454816
P85968	6-phosphogluconate dehydrogenase, decarboxylating [OS=Rattus norvegicus]	P85968	0.93575	1.0195	1.06575	1.04263	0.0602204	1.2075	1.0125	1.11	0.15056	0.939302	-0.0903393	0.57062	1.4625	1.086	1.27425	0.349648	0.818226	-0.289428	0.346421
Q66H12	alpha-N-acetylgalactosaminidase [OS=Rattus norvegicus]	Q66H12	1.03967	1.08567	1.23	1.15783	0.211428	1.02367	1.07333	1.0485	0.0683269	1.10428	0.143101	0.288347	1.47367	0.956333	1.215	0.280956	0.952949	-0.0695287	0.851152
P35704	Peroxiredoxin-2 [OS=Rattus norvegicus]	P35704	0.986	0.997	0.8705	0.93375	-0.0988918	0.9965	0.9815	0.989	-0.0159576	0.944135	-0.0829342	0.477147	1.374	0.957	1.1655	0.220949	0.801158	-0.319841	0.398921
P04631	Protein S100-B [OS=Rattus norvegicus]	P04631	1.231	1.06	1.3855	1.22275	0.290129	0.993	1.1145	1.05375	0.0755326	1.16038	0.214597	0.433247	1.1955	0.89	1.04275	0.0603933	1.17262	0.229736	0.504642
P31044	phosphatidylethanolamine-binding protein 1 [OS=Rattus norvegicus]	P31044	1.08933	1.121	0.883667	1.00233	0.00336237	0.936333	1.10233	1.01933	0.0276259	0.983322	-0.0242635	0.917278	1.281	1.02667	1.15383	0.206435	0.868699	-0.203072	0.475582
P62329	Thymosin beta-4 [OS=Rattus norvegicus]	P62329	0.995	1.34925	0.96925	1.15925	0.213192	1.25325	1.158	1.20562	0.269781	0.961534	-0.0565895	0.834887	1.4685	1.37275	1.42062	0.506526	0.816014	-0.293334	0.313834
P10959	Carboxylesterase 1C [OS=Rattus norvegicus]	P10959	1.0175	0.99275	0.90325	0.948	-0.077041	0.846	0.9515	0.89875	-0.154008	1.0548	0.0769672	0.550333	1.4055	0.90525	1.15538	0.208361	0.820513	-0.285402	0.50017
Q00715	Histone H2B type 1 [OS=Rattus norvegicus]	Q00715	0.981	0.731333	0.724	0.727667	-0.45865	0.692	0.921333	0.806667	-0.309955	0.902066	-0.148695	0.562222	0.808333	0.860667	0.8345	-0.261016	0.871979	-0.197634	0.0560742
P31232	transgelin [OS=Rattus norvegicus]	P31232	0.9746	1.3394	1.2872	1.3133	0.393197	1.2914	1.308	1.2997	0.378179	1.01046	0.0150179	0.668702	2.0622	1.2432	1.6527	0.724825	0.794639	-0.331628	0.495137
O35796	Complement component 1 Q subcomponent-binding protein, mitochondrial [OS=Rattus norvegicus]	O35796	0.77025	1.0565	1.0675	1.062	0.0867838	1.057	0.94875	1.00287	0.0041418	1.05896	0.082642	0.390668	1.465	1.00325	1.23412	0.303489	0.860529	-0.216705	0.533764
P04904	glutathione S-transferase alpha-3 [OS=Rattus norvegicus]	P04904	1.0996	0.9796	1.0668	1.0232	0.0330882	0.9588	1.0374	0.9981	-0.00274373	1.02515	0.0358319	0.710573	1.0072	0.9426	0.9749	-0.0366739	1.04954	0.069762	0.46731
P11232	thioredoxin [OS=Rattus norvegicus]	P11232	0.9885	1.4315	1.032	1.23175	0.300709	1.582	1.3755	1.47875	0.564378	0.832967	-0.263669	0.38657	3.149	1.633	2.391	1.25761	0.515161	-0.956905	0.277272
Q9QX79	Fetuin-B [OS=Rattus norvegicus]	Q9QX79	0.8745	1.3305	0.61975	0.975125	-0.0363409	1.18075	1.11075	1.14575	0.196292	0.85108	-0.232633	0.67991	1.025	1.163	1.094	0.129613	0.891339	-0.165954	0.773822
P27605	Hypoxanthine-guanine phosphoribosyltransferase [OS=Rattus norvegicus]	P27605	0.982333	0.927	0.962	0.9445	-0.0823773	1.12633	0.916333	1.02133	0.0304538	0.924772	-0.112831	0.545405	1.109	1.063	1.086	0.119024	0.869705	-0.201401	0.0392749
Q99PS8	Histidine-rich glycoprotein [OS=Rattus norvegicus]	Q99PS8	1.0275	1.685	1.303	1.494	0.57918	1.2695	1.2855	1.2775	0.353323	1.16947	0.225857	0.37492	1.653	1.183	1.418	0.503858	1.0536	0.0753226	0.82527
P20767	Ig lambda-2 chain C region [OS=Rattus norvegicus]	P20767	0.9985	1.544	1.516	1.53	0.613532	1.4275	1.3755	1.4015	0.486972	1.09169	0.12656	0.0489632	1.2595	1.358	1.30875	0.38819	1.16905	0.225342	0.0496033
P07897-2	Isoform 2 of Aggrecan core protein [OS=Rattus norvegicus]	P07897-2	1.096	0.657	0.768	0.7125	-0.489038	0.74	0.767	0.7535	-0.408321	0.945587	-0.0807175	0.547396	0.817	0.655	0.736	-0.442222	0.968071	-0.0468158	0.833139
Q68FU3	electron transfer flavoprotein subunit beta [OS=Rattus norvegicus]	Q68FU3	0.968	0.802	0.8675	0.83475	-0.260584	0.87	0.886	0.878	-0.187707	0.95074	-0.0728768	0.328119	1.1635	0.9485	1.056	0.0786098	0.790483	-0.339194	0.187816
P41562	Isocitrate dehydrogenase [NADP] cytoplasmic [OS=Rattus norvegicus]	P41562	0.8735	1.07	1.0675	1.06875	0.0959244	1.069	0.9975	1.03325	0.0471894	1.03436	0.0487351	0.425586	1.537	1.056	1.2965	0.374622	0.824335	-0.278698	0.443607
P36953	Afamin [OS=Rattus norvegicus]	P36953	1.00633	0.906667	0.817	0.861833	-0.214519	0.872333	0.900667	0.8865	-0.173807	0.972175	-0.0407117	0.652202	1.12267	0.904333	1.0135	0.0193461	0.850354	-0.233865	0.32747
Q63083	Nucleobindin-1 [OS=Rattus norvegicus]	Q63083	1.07775	1.18775	0.9705	1.07912	0.109862	0.97475	1.19	1.08237	0.1142	0.996997	-0.00433843	0.984973	1.365	1.115	1.24	0.31034	0.870262	-0.200478	0.433797
P50116	Protein S100-A9 [OS=Rattus norvegicus]	P50116	1.2695	1.382	3.0805	2.23125	1.15785	1.452	1.4615	1.45675	0.542753	1.53166	0.615099	0.458053	1.0125	0.9635	0.988	-0.0174171	2.25835	1.17527	0.280928
P04466	Myosin regulatory light chain 2, skeletal muscle isoform [OS=Rattus norvegicus]	P04466	0.98325	0.61325	0.56	0.586625	-0.76949	0.61375	1.00025	0.807	-0.309359	0.726921	-0.46013	0.375871	0.78275	1.13525	0.959	-0.0603973	0.611705	-0.709092	0.171905
O70196	prolyl endopeptidase [OS=Rattus norvegicus]	O70196	0.822667	0.812333	0.613667	0.713	-0.488026	0.716333	0.785333	0.750833	-0.413435	0.949612	-0.0745906	0.753446	1.08133	0.967333	1.02433	0.0346853	0.696062	-0.522711	0.112865
P13635	Ceruloplasmin [OS=Rattus norvegicus]	P13635	1.12233	1.934	2.132	2.033	1.02361	1.57867	1.27567	1.42717	0.513154	1.4245	0.510456	0.0788301	2.06033	1.39167	1.726	0.787432	1.17787	0.236178	0.471481
P06214	Delta-aminolevulinic acid dehydratase [OS=Rattus norvegicus]	P06214	1.02067	0.608667	0.726	0.667333	-0.583521	0.790667	0.758	0.774333	-0.368973	0.861817	-0.214547	0.22099	0.829333	0.679667	0.7545	-0.406407	0.884471	-0.177113	0.456074
P10860	Glutamate dehydrogenase 1, mitochondrial [OS=Rattus norvegicus]	P10860	1.024	1.033	1.0465	1.03975	0.0562367	1.0705	1.1605	1.1155	0.157691	0.932093	-0.101454	0.237882	1.313	1.2445	1.27875	0.354734	0.813099	-0.298498	0.0206748
P50115	Protein S100-A8 [OS=Rattus norvegicus]	P50115	0.972	1.2	1.497	1.3485	0.431356	1.217	1.137	1.177	0.235114	1.14571	0.196241	0.380817	1.437	1.029	1.233	0.302173	1.09367	0.129183	0.692057
Q7M0E3	Destrin [OS=Rattus norvegicus]	Q7M0E3	0.9915	1.1005	1.0685	1.0845	0.11703	1.1285	1.0015	1.065	0.0908534	1.01831	0.0261766	0.793956	1.4205	0.9435	1.182	0.24123	0.917513	-0.1242	0.722876
P05370	Glucose-6-phosphate 1-dehydrogenase [OS=Rattus norvegicus]	P05370	0.954	1.19767	1.27633	1.237	0.306846	1.44167	1.291	1.36633	0.450309	0.905343	-0.143464	0.26746	1.60733	1.473	1.54017	0.623086	0.80316	-0.316241	0.0600416
P09739	Troponin T, fast skeletal muscle [OS=Rattus norvegicus]	P09739	0.999333	0.731333	0.767333	0.749333	-0.41632	0.764667	1.00633	0.8855	-0.175436	0.846226	-0.240885	0.380999	0.82	1.09833	0.959167	-0.0601466	0.781234	-0.356174	0.273461
Q6PDV7	60S ribosomal protein L10 [OS=Rattus norvegicus]	Q6PDV7	1.04467	1.09633	2.04667	1.5715	0.652142	1.679	0.927333	1.30317	0.382022	1.20591	0.270121	0.701126	1.19333	0.793333	0.993333	-0.00965017	1.58205	0.661792	0.378654
D3ZHA0	Filamin-C [OS=Rattus norvegicus]	D3ZHA0	0.933	1.4575	1.9135	1.6855	0.753177	1.6375	1.275	1.45625	0.542258	1.15742	0.210919	0.513692	2.049	0.9515	1.50025	0.585203	1.12348	0.167974	0.78473
P16086	Spectrin alpha chain, non-erythrocytic 1 [OS=Rattus norvegicus]	P16086	0.918	0.927667	1.02133	0.9745	-0.0372659	1	1.068	1.034	0.0482362	0.942456	-0.0855021	0.411983	1.35	0.999	1.1745	0.232047	0.829715	-0.269313	0.385668
P45592	Cofilin-1 [OS=Rattus norvegicus]	P45592	0.916	1.121	1.123	1.122	0.166073	1.076	1.0455	1.06075	0.0850847	1.05774	0.080988	0.0569876	1.4965	1.1665	1.3315	0.413052	0.842659	-0.24698	0.331942
P10960	Prosaposin [OS=Rattus norvegicus]	P10960	1.0865	2.519	1.5495	2.03425	1.0245	2.5345	2.2345	2.3845	1.25369	0.853114	-0.22919	0.561378	5.6665	3.399	4.53275	2.18039	0.448789	-1.15589	0.179971
P02262	histone H2A type 1 [OS=Rattus norvegicus]	P02262	1.027	0.931333	0.813667	0.8725	-0.196773	0.727667	0.898667	0.813167	-0.298377	1.07297	0.101604	0.625221	0.854	0.944333	0.899167	-0.15334	0.970343	-0.0434334	0.753613
Q920A6	Retinoid-inducible serine carboxypeptidase [OS=Rattus norvegicus]	Q920A6	0.911	1.398	1.239	1.3185	0.398898	1.268	1.107	1.1875	0.247928	1.11032	0.15097	0.366506	2.109	1.241	1.675	0.744161	0.787164	-0.345264	0.503925
P09456	cAMP-dependent protein kinase type I-alpha regulatory subunit [OS=Rattus norvegicus]	P09456	0.992	0.97275	0.9875	0.980125	-0.0289623	1.068	0.9835	1.02575	0.0366792	0.95552	-0.0656415	0.398866	1.182	0.99475	1.08838	0.122176	0.90054	-0.151138	0.368223
P29457	Serpin H1 [OS=Rattus norvegicus]	P29457	0.931	1.59833	1.762	1.68017	0.748604	1.31467	1.192	1.25333	0.32577	1.34056	0.422834	0.0528924	2.14533	1.04567	1.5955	0.674009	1.05307	0.0745957	0.892921
Q3T1J1	Eukaryotic translation initiation factor 5A-1 [OS=Rattus norvegicus]	Q3T1J1	0.902	1.1585	1.1675	1.163	0.217851	1.184	0.929	1.0565	0.0792928	1.1008	0.138558	0.491676	1.25	1.1635	1.20675	0.271127	0.963746	-0.0532757	0.420298
P23928	Alpha-crystallin B chain [OS=Rattus norvegicus]	P23928	0.9495	0.676	0.552	0.614	-0.703689	0.8575	0.9885	0.923	-0.115597	0.665222	-0.588092	0.0756516	1.3425	0.6565	0.9995	-0.000721528	0.614307	-0.702968	0.383965
Q3T1I4	protein PRRC1 [OS=Rattus norvegicus]	Q3T1I4	0.9895	1.1565	1.16825	1.16237	0.217076	1.01175	1.2225	1.11713	0.159791	1.04051	0.057285	0.709867	1.39175	1.00925	1.2005	0.263635	0.968242	-0.0465598	0.860485
Q6P7Q4	lactoylglutathione lyase [OS=Rattus norvegicus]	Q6P7Q4	1.00533	1.00433	0.904667	0.9545	-0.0671829	0.960333	0.928	0.944167	-0.0828865	1.01094	0.0157036	0.861865	0.886333	0.919	0.902667	-0.147735	1.05742	0.0805519	0.427138
P62815	V-type proton ATPase subunit B, brain isoform [OS=Rattus norvegicus]	P62815	0.985667	0.969	1.002	0.9855	-0.0210722	0.971	0.955333	0.963167	-0.0541426	1.02319	0.0330704	0.345959	1.072	1.00567	1.03883	0.0549642	0.94866	-0.0760364	0.2866
O08730	Glycogenin-1 [OS=Rattus norvegicus]	O08730	1.0155	1.112	1.1935	1.15275	0.20508	1.384	1.1625	1.27325	0.348516	0.90536	-0.143436	0.41461	1.129	1.3815	1.25525	0.327975	0.918343	-0.122895	0.520554
P07895	Superoxide dismutase [Mn], mitochondrial [OS=Rattus norvegicus]	P07895	0.986333	1.749	1.42567	1.58733	0.666605	1.83	1.663	1.7465	0.804467	0.908865	-0.137862	0.473957	4.21267	2.50567	3.35917	1.7481	0.472538	-1.0815	0.178207
Q7TP54	RHO family-interacting cell polarization regulator 2 [OS=Rattus norvegicus]	Q7TP54	1.19367	1.14333	1.33433	1.23883	0.308982	1.134	1.106	1.12	0.163499	1.1061	0.145483	0.343392	1.32133	1.21433	1.26783	0.342365	0.977126	-0.033383	0.815872
Q9JI85	Nucleobindin-2 [OS=Rattus norvegicus]	Q9JI85	1.039	1.11133	1.06433	1.08783	0.121458	1.02167	1.071	1.04633	0.0653425	1.03966	0.056115	0.347381	1.14	1.115	1.1275	0.173127	0.964819	-0.0516699	0.27463
P31977	Ezrin [OS=Rattus norvegicus]	P31977	1.002	0.94	0.8525	0.89625	-0.158027	0.9495	1.118	1.03375	0.0478873	0.866989	-0.205914	0.284499	1.1245	1.0655	1.095	0.130931	0.818493	-0.288958	0.0638133
P14604	Enoyl-CoA hydratase, mitochondrial [OS=Rattus norvegicus]	P14604	1.027	1.0375	1.1515	1.0945	0.130272	1.018	1.0255	1.02175	0.0310422	1.0712	0.0992297	0.330812	1.279	1.0895	1.18425	0.243974	0.924214	-0.113702	0.502219
P62828	GTP-binding nuclear protein RAN [OS=Rattus norvegicus]	P62828	1.04067	1.07867	1.012	1.04533	0.0639631	1.058	1.039	1.0485	0.0683269	0.99698	-0.0043638	0.935535	1.42367	1.07433	1.249	0.320773	0.836936	-0.25681	0.37063
P48199	C-reactive protein [OS=Rattus norvegicus]	P48199	1.118	1.566	1.748	1.657	0.728574	0.99	1.019	1.0045	0.00647756	1.64958	0.722096	0.0193664	0.961	0.981	0.971	-0.0424568	1.70649	0.77103	0.0173473
Q71UF4	Histone-binding protein RBBP7 [OS=Rattus norvegicus]	Q71UF4	1.0224	1.0222	1.0386	1.0304	0.0432045	1.0324	1.0446	1.0385	0.0545012	0.9922	-0.0112967	0.511116	1.0064	0.9746	0.9905	-0.0137711	1.04028	0.0569756	0.15547
Q9Z1A6	Vigilin [OS=Rattus norvegicus]	Q9Z1A6	1.01133	1.031	1.02067	1.02583	0.0367964	1.054	1.037	1.0455	0.0641931	0.981189	-0.0273967	0.186652	1.12033	0.997333	1.05883	0.0824755	0.968834	-0.0456792	0.646347
P48004-1	Proteasome subunit alpha type-7 [OS=Rattus norvegicus]	P48004-1	0.95	0.903	0.843	0.873	-0.195946	0.953667	0.885	0.919333	-0.12134	0.949601	-0.0746064	0.416455	0.896667	0.863667	0.880167	-0.184151	0.991858	-0.0117951	0.853578
P02650	Apolipoprotein E [OS=Rattus norvegicus]	P02650	1.0985	2.316	2.1175	2.21675	1.14845	2.972	1.965	2.4685	1.30363	0.898015	-0.155189	0.672278	2.869	2.0335	2.45125	1.29352	0.904335	-0.145072	0.639751
P47860	ATP-dependent 6-phosphofructokinase, platelet type [OS=Rattus norvegicus]	P47860	1.24633	1.256	1.43767	1.34683	0.429571	1.24967	1.583	1.41633	0.502161	0.95093	-0.0725895	0.749356	1.82733	1.39233	1.60983	0.686911	0.836629	-0.25734	0.38059
Q8VHF5	citrate synthase, mitochondrial [OS=Rattus norvegicus]	Q8VHF5	1.093	0.911	1.068	0.9895	-0.0152284	0.799	1.027	0.913	-0.131313	1.08379	0.116085	0.635998	1.369	0.798	1.0835	0.115699	0.913244	-0.130928	0.780969
P31211	corticosteroid-binding globulin [OS=Rattus norvegicus]	P31211	1.129	1.07	1.06633	1.06817	0.0951368	0.992667	1.116	1.05433	0.0763311	1.01312	0.0188057	0.843408	0.927333	1.012	0.969667	-0.0444392	1.10158	0.139576	0.145679
P51607	N-acylglucosamine 2-epimerase [OS=Rattus norvegicus]	P51607	1.017	1.232	1.1515	1.19175	0.253082	1.4385	1.1395	1.289	0.366252	0.924554	-0.113171	0.59408	1.312	1.2045	1.25825	0.331419	0.947149	-0.078337	0.426394
P02454	Collagen alpha-1(I) chain [OS=Rattus norvegicus]	P02454	1.06733	1.49667	1.51267	1.50467	0.589444	1.05133	1.04367	1.0475	0.0669502	1.43644	0.522494	0.000376301	1.278	1.04367	1.16083	0.215161	1.2962	0.374283	0.0995465
P14408-1	fumarate hydratase, mitochondrial [OS=Rattus norvegicus]	P14408-1	0.918667	0.981333	1.01733	0.999333	-0.000962117	1.04233	1.068	1.05517	0.0774709	0.947086	-0.078433	0.127471	1.47733	1.04	1.25867	0.331896	0.793962	-0.332858	0.358706
Q9WTT6	guanine deaminase [OS=Rattus norvegicus]	Q9WTT6	0.950667	1.09433	1.13167	1.113	0.154454	1.17533	1.10667	1.141	0.190299	0.97546	-0.0358452	0.548059	1.52833	1.155	1.34167	0.424026	0.829565	-0.269573	0.347131
Q63416	Inter-alpha-trypsin inhibitor heavy chain H3 [OS=Rattus norvegicus]	Q63416	0.9645	1.5225	1.422	1.47225	0.558023	1.0875	1.03	1.05875	0.082362	1.39055	0.475661	0.019044	1.1655	0.979	1.07225	0.100641	1.37305	0.457381	0.0635201
Q63797	Proteasome activator complex subunit 1 [OS=Rattus norvegicus]	Q63797	0.9305	1.385	1.254	1.3195	0.399991	1.6815	1.285	1.48325	0.568762	0.889601	-0.16877	0.515016	2.0785	1.532	1.80525	0.852199	0.730924	-0.452207	0.226003
P10760	Adenosylhomocysteinase [OS=Rattus norvegicus]	P10760	1.023	1.09833	1.131	1.11467	0.156612	1.108	1.07333	1.09067	0.12521	1.022	0.0314021	0.419698	1.56533	1.067	1.31617	0.396342	0.846904	-0.23973	0.504397
Q01129	decorin [OS=Rattus norvegicus]	Q01129	1.055	0.9475	0.9175	0.9325	-0.100824	1.046	0.9385	0.99225	-0.0112244	0.939783	-0.0895999	0.396378	1.0865	1.0275	1.057	0.0799754	0.882214	-0.1808	0.0639561
Q5XI78	2-oxoglutarate dehydrogenase, mitochondrial [OS=Rattus norvegicus]	Q5XI78	0.934	0.844333	0.827333	0.835833	-0.258713	0.897	0.923333	0.910167	-0.135797	0.91833	-0.122915	0.04169	1.04867	1.009	1.02883	0.0410093	0.812409	-0.299722	0.0122705
P16409	myosin light chain 3 [OS=Rattus norvegicus]	P16409	0.948	0.548	0.464333	0.506167	-0.982316	0.531333	0.886667	0.709	-0.496142	0.713916	-0.486173	0.382147	0.525	0.843333	0.684167	-0.54758	0.739829	-0.434735	0.392502
P12847	Myosin-3 [OS=Rattus norvegicus]	P12847	0.928	0.826	0.809	0.8175	-0.290709	0.835	0.9785	0.90675	-0.141223	0.901572	-0.149486	0.342151	0.6755	1.2855	0.9805	-0.0284105	0.833758	-0.262299	0.646622
P40307	proteasome subunit beta type-2 [OS=Rattus norvegicus]	P40307	0.845667	0.898667	0.883333	0.891	-0.166503	0.921667	0.84	0.880833	-0.183059	1.01154	0.0165564	0.829505	1.19867	0.861333	1.03	0.0426443	0.865049	-0.209147	0.496904
P01015	Angiotensinogen [OS=Rattus norvegicus]	P01015	0.929	1.337	1.229	1.283	0.359521	1.069	0.988	1.0285	0.0405418	1.24745	0.318979	0.0636973	1.685	1.145	1.415	0.500802	0.906714	-0.141281	0.67896
Q62736	Non-muscle caldesmon [OS=Rattus norvegicus]	Q62736	0.966	1.141	0.797	0.969	-0.0454314	0.959	1.026	0.9925	-0.010861	0.976322	-0.0345704	0.905595	1.443	1.009	1.226	0.293959	0.790375	-0.33939	0.451319
B2RZ78	Vacuolar protein sorting-associated protein 29 [OS=Rattus norvegicus]	B2RZ78	1.0345	1.1325	1.2025	1.1675	0.223423	1.0845	1.0945	1.0895	0.123666	1.07159	0.0997564	0.158121	1.326	1.0175	1.17175	0.228665	0.996373	-0.00524224	0.981004
P18422	Proteasome subunit alpha type-3 [OS=Rattus norvegicus]	P18422	1.114	1.084	1.1435	1.11375	0.155425	1.082	1.143	1.1125	0.153805	1.00112	0.0016201	0.979259	1.2275	0.9105	1.069	0.0962619	1.04186	0.0591636	0.807457
O88483	[Pyruvate dehydrogenase [acetyl-transferring]]-phosphatase 1, mitochondrial [OS=Rattus norvegicus]	O88483	1.02867	0.903	0.993333	0.948167	-0.0767874	0.918667	1.07267	0.995667	-0.00626526	0.952293	-0.0705222	0.647848	1.02433	1.03833	1.03133	0.0445107	0.91936	-0.121298	0.21043
Q00438-1	Polypyrimidine tract-binding protein 1 [OS=Rattus norvegicus]	Q00438-1	0.882	1.031	0.89775	0.964375	-0.0523338	0.96575	0.93175	0.94875	-0.0759001	1.01647	0.0235663	0.841352	1.18	0.87675	1.02838	0.0403664	0.937766	-0.0927003	0.736414
P17164	tissue alpha-L-fucosidase [OS=Rattus norvegicus]	P17164	0.904333	1.04933	1.09867	1.074	0.102994	1.021	0.923	0.972	-0.0409718	1.10494	0.143966	0.20407	1.15133	0.856667	1.004	0.00575927	1.06972	0.0972347	0.685472
Q63081	Protein disulfide-isomerase A6 [OS=Rattus norvegicus]	Q63081	1.032	1.8115	1.6555	1.7335	0.793688	1.519	1.5415	1.53025	0.613767	1.13282	0.17992	0.12317	2.2855	1.49	1.88775	0.916668	0.918289	-0.12298	0.740149
P09527	ras-related protein Rab-7a [OS=Rattus norvegicus]	P09527	0.956	1.0945	1.152	1.12325	0.167679	1.1655	1.0615	1.1135	0.155102	1.00876	0.0125775	0.884744	1.459	1.2095	1.33425	0.416029	0.841859	-0.24835	0.241082
Q63798	proteasome activator complex subunit 2 [OS=Rattus norvegicus]	Q63798	0.905	1.177	1.1865	1.18175	0.240925	1.305	1.188	1.2465	0.317883	0.948055	-0.076958	0.384926	1.797	1.157	1.477	0.56267	0.800102	-0.321745	0.453632
P24049	60S ribosomal protein L17 [OS=Rattus norvegicus]	P24049	0.988	1.008	1.3975	1.20275	0.266337	1.229	0.8995	1.06425	0.0898371	1.13014	0.1765	0.641584	1.647	0.928	1.2875	0.364572	0.934175	-0.0982356	0.854978
A0JPQ4	Tripartite motif-containing protein 72 [OS=Rattus norvegicus]	A0JPQ4	1.004	0.926	0.939	0.9325	-0.100824	0.931	0.949	0.94	-0.0892673	0.992021	-0.011557	0.568958	1.046	0.957	1.0015	0.00216242	0.931103	-0.102987	0.264708
Q811A3-2	Isoform 2 of Procollagen-lysine,2-oxoglutarate 5-dioxygenase 2 [OS=Rattus norvegicus]	Q811A3-2	1.0505	1.312	1.363	1.3375	0.419539	1.0815	1.0035	1.0425	0.0600474	1.28297	0.359492	0.0240532	1.3535	0.987	1.17025	0.226817	1.14292	0.192722	0.46142
P24268	Cathepsin D [OS=Rattus norvegicus]	P24268	0.884	1.8305	1.192	1.51125	0.595742	2.1185	1.399	1.75875	0.81455	0.859275	-0.218808	0.658071	2.362	2.617	2.4895	1.31586	0.60705	-0.720114	0.104491
P62083	40S ribosomal protein S7 [OS=Rattus norvegicus]	P62083	0.976	0.94775	1.12675	1.03725	0.0527637	1.12725	0.8915	1.00937	0.0134623	1.02762	0.0393014	0.867988	1.10675	0.8615	0.984125	-0.0230865	1.05398	0.0758502	0.759801
P62898	Cytochrome c, somatic [OS=Rattus norvegicus]	P62898	0.9595	0.884	0.8735	0.87875	-0.186475	0.8645	0.8665	0.8655	-0.208394	1.01531	0.021919	0.131381	1.107	0.9215	1.01425	0.0204133	0.866404	-0.206889	0.282058
P02401	60S acidic ribosomal protein P2 [OS=Rattus norvegicus]	P02401	1.1475	1.8605	2.1515	2.006	1.00432	1.69	1.417	1.5535	0.635522	1.29128	0.368799	0.151438	2.9965	1.379	2.18775	1.12945	0.916924	-0.125126	0.845481
B2GUZ5	F-actin-capping protein subunit alpha-1 [OS=Rattus norvegicus]	B2GUZ5	0.904	0.8725	0.851	0.86175	-0.214659	0.9405	0.8585	0.8995	-0.152805	0.958032	-0.0618539	0.467103	1.072	0.924	0.998	-0.00288828	0.863477	-0.21177	0.210025
P16975	Sparc [OS=Rattus norvegicus]	P16975	1.17433	0.976	1.033	1.0045	0.00647756	0.950333	1.01167	0.981	-0.027675	1.02396	0.0341525	0.631083	1.11867	1.031	1.07483	0.104113	0.934563	-0.0976354	0.310789
P62425	60S ribosomal protein L7a [OS=Rattus norvegicus]	P62425	1.071	0.9625	1.11	1.03625	0.0513721	1.081	0.8945	0.98775	-0.0177822	1.0491	0.0691543	0.722841	1.425	0.8905	1.15775	0.211324	0.895055	-0.159952	0.703998
A0JPJ7	obg-like ATPase 1 [OS=Rattus norvegicus]	A0JPJ7	0.735	0.988	1	0.994	-0.00868224	0.941	0.906	0.9235	-0.114816	1.07634	0.106134	0.062476	1.656	0.812	1.234	0.303342	0.805511	-0.312025	0.626926
Q9JJ54	heterogeneous nuclear ribonucleoprotein D0 [OS=Rattus norvegicus]	Q9JJ54	0.9295	1.345	1.5025	1.42375	0.509696	1.3975	1.1335	1.2655	0.339708	1.12505	0.169988	0.411438	1.741	1.195	1.468	0.553852	0.969857	-0.0441561	0.890538
O88767	protein/nucleic acid deglycase DJ-1 [OS=Rattus norvegicus]	O88767	1.1045	1.068	1.0885	1.07825	0.108692	0.9615	0.9525	0.957	-0.0634092	1.1267	0.172101	0.0084163	1.275	1.1805	1.22775	0.296017	0.878233	-0.187325	0.0906013
P30904	Macrophage Migration inhibitory factor [OS=Rattus norvegicus]	P30904	1.256	0.994	0.984	0.989	-0.0159576	0.997	1.037	1.017	0.0243197	0.972468	-0.0402773	0.307321	1.67	0.926	1.298	0.37629	0.761941	-0.392248	0.493578
P70615	Lamin-B1 [OS=Rattus norvegicus]	P70615	1.008	0.925	0.971	0.948	-0.077041	0.976	1.014	0.995	-0.00723157	0.952764	-0.0698095	0.255841	1.032	0.98	1.006	0.00863031	0.942346	-0.0856713	0.23671
P60901	Proteasome subunit alpha type-6 [OS=Rattus norvegicus]	P60901	1.3035	1.2665	1.454	1.36025	0.443872	1.399	1.2335	1.31625	0.396434	1.03343	0.0474383	0.758552	2.2225	1.24	1.73125	0.791814	0.785704	-0.347942	0.535477
P38656	Lupus La protein homolog [OS=Rattus norvegicus]	P38656	0.9725	1.017	0.975	0.996	-0.00578235	1.045	0.992	1.0185	0.026446	0.977909	-0.0322283	0.574238	1.3575	1.026	1.19175	0.253082	0.835746	-0.258864	0.36203
Q5RKI0	WD repeat-containing protein 1 [OS=Rattus norvegicus]	Q5RKI0	1.20533	1.67767	1.65233	1.665	0.735522	1.56067	1.26033	1.4105	0.496207	1.18043	0.239316	0.23332	1.64933	1.51967	1.5845	0.664028	1.0508	0.0714945	0.347226
P34067	Proteasome subunit beta type-4 [OS=Rattus norvegicus]	P34067	1.123	1.067	1.453	1.26	0.333424	1.243	1.06	1.1515	0.203514	1.09422	0.129909	0.661951	0.933	0.949	0.941	-0.0877334	1.339	0.421157	0.240448
Q6IFW6	Keratin, type I cytoskeletal 10 [OS=Rattus norvegicus]	Q6IFW6	0.528	0.5785	0.616	0.59725	-0.743593	0.7455	0.608	0.67675	-0.563305	0.882527	-0.180288	0.380652	0.7855	0.817	0.80125	-0.319676	0.745398	-0.423918	0.0141044
Q66HD3	Nuclear autoantigenic sperm protein [OS=Rattus norvegicus]	Q66HD3	1.1365	1.072	1.099	1.0855	0.11836	0.995	1.1095	1.05225	0.0734775	1.0316	0.0448822	0.628838	1.324	1.2165	1.27025	0.345112	0.854556	-0.226753	0.0794113
P08649	Complement C4 [OS=Rattus norvegicus]	P08649	1.0755	1.307	1.7785	1.54275	0.625504	1.349	1.187	1.268	0.342555	1.21668	0.28295	0.38528	1.7335	1.3155	1.5245	0.608336	1.01197	0.0171681	0.959074
Q66H80	Coatomer subunit delta [OS=Rattus norvegicus]	Q66H80	0.995	1.187	1.208	1.1975	0.260026	1.158	1.137	1.1475	0.198494	1.04357	0.0615315	0.0780179	1.817	1.157	1.487	0.572405	0.805313	-0.312379	0.473053
B2RZ78-2	Isoform 2 of Vacuolar protein sorting-associated protein 29 [OS=Rattus norvegicus]	B2RZ78-2	0.888	0.942	0.857	0.8995	-0.152805	0.895	0.873	0.884	-0.177882	1.01753	0.0250769	0.757776	0.993	1.017	1.005	0.0071955	0.895025	-0.16	0.139478
P62853	40S ribosomal protein S25 [OS=Rattus norvegicus]	P62853	1.207	1.723	2.131	1.927	0.946357	1.862	1.378	1.62	0.695994	1.18951	0.250363	0.434392	2.344	1.33	1.837	0.877352	1.04899	0.0690049	0.884333
P62250	40S ribosomal protein S16 [OS=Rattus norvegicus]	P62250	0.908	1.116	1.428	1.272	0.347099	1.859	0.828	1.3435	0.425996	0.946781	-0.0788977	0.906539	1.63	1.088	1.359	0.442545	0.935982	-0.0954468	0.806963
Q02874-1	Core histone macro-H2A.1 [OS=Rattus norvegicus]	Q02874-1	0.913	0.8015	0.915	0.85825	-0.22053	1.091	1.025	1.058	0.0813396	0.8112	-0.30187	0.0931613	1.2385	0.9605	1.0995	0.136848	0.780582	-0.357378	0.249329
P29410-1	Adenylate kinase 2, mitochondrial [OS=Rattus norvegicus]	P29410-1	0.997	1.174	1.217	1.1955	0.257614	1.272	1.165	1.2185	0.285106	0.981124	-0.0274921	0.728527	1.868	1.231	1.5495	0.631803	0.771539	-0.374189	0.382946
Q8CFN2	Cell division control protein 42 homolog [OS=Rattus norvegicus]	Q8CFN2	0.991	1.157	1.109	1.133	0.180148	1.152	1.107	1.1295	0.175684	1.0031	0.00446359	0.924982	2.002	1.434	1.718	0.78073	0.659488	-0.600582	0.176537
P61589	Transforming protein RhoA [OS=Rattus norvegicus]	P61589	1.051	1.217	1.296	1.2565	0.329411	1.319	1.209	1.264	0.337996	0.994066	-0.00858579	0.921921	1.772	1.376	1.574	0.654436	0.798285	-0.325025	0.256452
Q641Z6	EH domain-containing protein 1 [OS=Rattus norvegicus]	Q641Z6	0.8815	0.808	0.7045	0.75625	-0.403065	0.861	0.9325	0.89675	-0.157222	0.843323	-0.245843	0.155093	1.1675	0.836	1.00175	0.00252251	0.754929	-0.405587	0.292987
Q6P7B0	Tryptophan--tRNA ligase, cytoplasmic [OS=Rattus norvegicus]	Q6P7B0	0.9495	1.0385	1.0495	1.044	0.0621217	1.017	0.9565	0.98675	-0.0192435	1.05802	0.0813652	0.203646	1.459	0.9945	1.22675	0.294841	0.851029	-0.23272	0.513898
Q9WUW3	Complement factor I [OS=Rattus norvegicus]	Q9WUW3	0.966	1.345	1.23	1.2875	0.364572	1.112	1.011	1.0615	0.0861044	1.21291	0.278468	0.0980828	1.608	1.153	1.3805	0.465191	0.932633	-0.100618	0.73015
Q4V7C7	actin-related protein 3 [OS=Rattus norvegicus]	Q4V7C7	0.979	1.067	1.1225	1.09475	0.130601	1.215	1.12	1.1675	0.223423	0.937687	-0.0928211	0.31699	1.625	1.0465	1.33575	0.41765	0.819577	-0.287049	0.494117
P11030	acyl-CoA-binding protein [OS=Rattus norvegicus]	P11030	0.947	0.821	0.659	0.74	-0.434403	0.812	0.828	0.82	-0.286304	0.902439	-0.148099	0.429299	1.032	0.774	0.903	-0.147202	0.819491	-0.287201	0.396598
Q5I0D1	Glyoxalase domain-containing protein 4 [OS=Rattus norvegicus]	Q5I0D1	0.826	0.9495	0.822	0.88575	-0.175029	0.9655	0.973	0.96925	-0.0450593	0.913851	-0.129969	0.321127	0.9535	0.8625	0.908	-0.139236	0.975496	-0.0357927	0.803056
Q7TP47	Heterogeneous nuclear ribonucleoprotein Q [OS=Rattus norvegicus]	Q7TP47	1.032	0.966	0.9585	0.96225	-0.0555163	0.929	0.9055	0.91725	-0.124613	1.04906	0.0690968	0.0675953	1.108	0.9965	1.05225	0.0734775	0.914469	-0.128994	0.248544
P70619	glutathione reductase [OS=Rattus norvegicus]	P70619	1.157	1.18	1.412	1.296	0.374066	1.231	1.366	1.2985	0.376846	0.998075	-0.0027803	0.986829	1.813	1.289	1.551	0.633199	0.83559	-0.259133	0.46739
P05708	Hexokinase-1 [OS=Rattus norvegicus]	P05708	0.749	0.941	1.172	1.0565	0.0792928	1.005	0.975	0.99	-0.0144996	1.06717	0.0937923	0.625628	1.918	0.921	1.4195	0.505383	0.744276	-0.42609	0.551631
Q4V8H8	EH domain-containing protein 2 [OS=Rattus norvegicus]	Q4V8H8	1.0025	1.207	1.3105	1.25875	0.331992	1.253	1.133	1.193	0.254594	1.05511	0.0773977	0.493919	1.5845	1.255	1.41975	0.505637	0.8866	-0.173645	0.449592
P00763	Anionic trypsin-2 [OS=Rattus norvegicus]	P00763	1.211	1.0555	1.074	1.06475	0.0905147	1.143	0.925	1.034	0.0482362	1.02974	0.0422785	0.805046	1.247	1.0335	1.14025	0.18935	0.933786	-0.0988354	0.554046
P49432	Pyruvate dehydrogenase E1 component subunit beta, mitochondrial [OS=Rattus norvegicus]	P49432	0.862333	0.759333	0.694	0.726667	-0.460634	0.872	0.931667	0.901833	-0.149067	0.805766	-0.311567	0.0582658	0.894	1.03367	0.963833	-0.0531444	0.753934	-0.40749	0.091413
Q7M767	Ubiquitin-conjugating enzyme E2 variant 2 [OS=Rattus norvegicus]	Q7M767	0.9035	0.841	0.8195	0.83025	-0.268382	0.9245	0.8685	0.8965	-0.157625	0.926102	-0.110758	0.157821	0.9345	0.9045	0.9195	-0.121079	0.902936	-0.147304	0.0401943
O35264	platelet-activating factor acetylhydrolase IB subunit beta [OS=Rattus norvegicus]	O35264	1.01	1.162	1.089	1.1255	0.170566	1.149	1.049	1.099	0.136191	1.02411	0.0343747	0.710287	1.43	1.264	1.347	0.42975	0.835561	-0.259184	0.134559
P19944	60S acidic ribosomal protein P1 [OS=Rattus norvegicus]	P19944	1.124	1.011	1.135	1.073	0.10165	1.002	0.998	1	0	1.073	0.10165	0.360362	1.75	1.023	1.3865	0.471448	0.773891	-0.369798	0.484773
Q08163	adenylyl cyclase-associated protein 1 [OS=Rattus norvegicus]	Q08163	1.023	0.984	0.9485	0.96625	-0.0495316	1.152	1.0725	1.11225	0.153481	0.868735	-0.203013	0.0785709	1.4475	1.1365	1.292	0.369606	0.747872	-0.419138	0.172871
Q9Z2F5	C-terminal-binding protein 1 [OS=Rattus norvegicus]	Q9Z2F5	1.231	1.01	1.255	1.1325	0.179511	0.861	1.106	0.9835	-0.024003	1.1515	0.203514	0.480385	0.869	0.788	0.8285	-0.271426	1.36693	0.450937	0.142586
P11762	Galectin-1 [OS=Rattus norvegicus]	P11762	0.9645	1.212	1	1.106	0.145351	1.129	1.084	1.1065	0.146003	0.999548	-0.000652066	0.996737	1.2185	1.1655	1.192	0.253384	0.927852	-0.108033	0.513686
Q4VSI4	Ubiquitin carboxyl-terminal hydrolase 7 [OS=Rattus norvegicus]	Q4VSI4	1.159	1.074	1.478	1.276	0.351628	0.976	1.101	1.0385	0.0545012	1.2287	0.297127	0.378065	1.17	0.911	1.0405	0.057277	1.22633	0.294351	0.429849
Q8CG45	aflatoxin B1 aldehyde reductase member 2 [OS=Rattus norvegicus]	Q8CG45	1.079	1.066	1.122	1.094	0.129613	0.979	0.963	0.971	-0.0424568	1.12667	0.17207	0.0517397	1.53	0.996	1.263	0.336855	0.866192	-0.207242	0.59334
Q9EQP5	prolargin [OS=Rattus norvegicus]	Q9EQP5	1.148	1.416	1.583	1.4995	0.584482	1.393	1.278	1.3355	0.41738	1.1228	0.167102	0.247144	1.947	1.348	1.6475	0.720278	0.910167	-0.135797	0.681
P50503	Hsc70-interacting protein [OS=Rattus norvegicus]	P50503	0.908	0.8795	0.92	0.89975	-0.152404	0.963	0.889	0.926	-0.110916	0.971652	-0.041488	0.59721	0.7755	0.943	0.85925	-0.21885	1.04713	0.0664463	0.684598
Q6B345	protein S100-A11 [OS=Rattus norvegicus]	Q6B345	0.925	1.385	1.413	1.399	0.484396	1.336	1.425	1.3805	0.465191	1.0134	0.0192051	0.729999	2.805	1.116	1.9605	0.971222	0.713593	-0.486826	0.574577
P04762	catalase [OS=Rattus norvegicus]	P04762	1.021	0.9905	1.003	0.99675	-0.00469639	0.964	0.9605	0.96225	-0.0555163	1.03585	0.0508199	0.0336172	1.2435	1.038	1.14075	0.189983	0.873767	-0.194679	0.296759
Q6P7S1	Acid ceramidase [OS=Rattus norvegicus]	Q6P7S1	1.1265	1.246	1.435	1.3405	0.422771	1.2025	1.4205	1.3115	0.391218	1.02211	0.0315534	0.859269	1.5505	1.181	1.36575	0.449693	0.981512	-0.0269222	0.914278
P00786	Pro-cathepsin H [OS=Rattus norvegicus]	P00786	0.9375	1.5385	1.335	1.43675	0.522809	1.4265	1.2345	1.3305	0.411969	1.07986	0.110841	0.526852	1.35	1.376	1.363	0.446786	1.05411	0.0760235	0.546814
O35854	Branched-chain-amino-acid aminotransferase, mitochondrial [OS=Rattus norvegicus]	O35854	1.076	1.091	1.369	1.23	0.298658	1.114	1.204	1.159	0.212881	1.06126	0.0857777	0.675026	1.311	0.919	1.115	0.157044	1.10314	0.141615	0.679439
Q4KM73	UMP-CMP kinase [OS=Rattus norvegicus]	Q4KM73	0.921	1.0555	1.1455	1.1005	0.138159	1.0395	0.9785	1.009	0.0129262	1.09068	0.125233	0.234377	1.5475	1.102	1.32475	0.40572	0.830723	-0.267561	0.427765
Q63945-1	Protein SET [OS=Rattus norvegicus]	Q63945-1	1.046	1.268	1.1995	1.23375	0.30305	1.139	1.06	1.0995	0.136848	1.1221	0.166202	0.124057	0.9105	1.1215	1.016	0.0229004	1.21432	0.28015	0.188616
Q9QZR6	Septin-9 [OS=Rattus norvegicus]	Q9QZR6	0.962	0.948	1.02	0.984	-0.0232698	1.081	0.953	1.017	0.0243197	0.967552	-0.0475895	0.697146	1.287	0.926	1.1065	0.146003	0.889291	-0.169273	0.574177
Q91Y81	septin-2 [OS=Rattus norvegicus]	Q91Y81	0.8055	0.8685	0.8795	0.874	-0.194295	0.879	0.7895	0.83425	-0.261448	1.04765	0.0671535	0.470972	1.0955	0.886	0.99075	-0.013407	0.88216	-0.180888	0.38154
Q6IMF3	Keratin, type II cytoskeletal 1 [OS=Rattus norvegicus]	Q6IMF3	0.556	0.67	0.724	0.697	-0.520769	0.764	0.725	0.7445	-0.425656	0.936199	-0.0951132	0.289917	0.868	1.059	0.9635	-0.0536434	0.723404	-0.467126	0.115202
P13086	Succinate--CoA ligase [ADP/GDP-forming] subunit alpha, mitochondrial [OS=Rattus norvegicus]	P13086	0.951	0.906	0.873	0.8895	-0.168933	0.832	0.858	0.845	-0.242977	1.05266	0.0740433	0.168297	1.594	0.85	1.222	0.289244	0.727905	-0.458178	0.466113
P17220	Proteasome subunit alpha type-2 [OS=Rattus norvegicus]	P17220	1.109	1.217	1.186	1.2015	0.264837	1.211	1.388	1.2995	0.377957	0.924586	-0.11312	0.389275	1.765	1.033	1.399	0.484396	0.858828	-0.219559	0.643782
P13383	Nucleolin [OS=Rattus norvegicus]	P13383	1.014	1.259	1.361	1.31	0.389567	1.313	0.902	1.1075	0.147307	1.18284	0.24226	0.439805	0.952	1.051	1.0015	0.00216242	1.30804	0.387404	0.0491915
P23562-1	Band 3 anion transport protein [OS=Rattus norvegicus]	P23562-1	0.933	1.1	1.3565	1.22825	0.296604	1.4	1.2325	1.31625	0.396434	0.933143	-0.0998293	0.62363	1.767	1.049	1.408	0.493647	0.872337	-0.197043	0.683707
O35987	NSFL1 cofactor p47 [OS=Rattus norvegicus]	O35987	0.917	0.863	0.7955	0.82925	-0.270121	0.939	0.8935	0.91625	-0.126187	0.905048	-0.143934	0.166012	1.234	0.9265	1.08025	0.111365	0.767646	-0.381486	0.251853
Q9WV25-1	poly(U)-binding-splicing factor PUF60 [OS=Rattus norvegicus]	Q9WV25-1	0.971	0.793	0.83	0.8115	-0.301337	0.822	0.737	0.7795	-0.359379	1.04105	0.0580421	0.561314	1.463	0.954	1.2085	0.273217	0.671494	-0.574554	0.260021
Q5I0G4	Glycine--tRNA ligase [OS=Rattus norvegicus]	Q5I0G4	1.0065	1.675	2.719	2.197	1.13553	1.342	1.3795	1.36075	0.444402	1.61455	0.691133	0.25053	1.315	1.044	1.1795	0.238175	1.86265	0.897359	0.199834
Q4FZY0	EF-hand domain-containing protein D2 [OS=Rattus norvegicus]	Q4FZY0	0.972	1.042	0.9455	0.99375	-0.00904514	1.114	1.02	1.067	0.0935602	0.93135	-0.102605	0.390423	1.3335	1.065	1.19925	0.262132	0.828643	-0.271178	0.286409
A7E3N2	Neutrophil cytosol factor 2 [OS=Rattus norvegicus]	A7E3N2	0.901	0.92	0.884	0.902	-0.148801	1.156	1.033	1.0945	0.130272	0.824121	-0.279073	0.095244	1.376	1.013	1.1945	0.256407	0.755128	-0.405208	0.249972
P62850-1	40S ribosomal protein S24 [OS=Rattus norvegicus]	P62850-1	0.916	1.004	1.217	1.1105	0.151209	1.237	0.9	1.0685	0.0955869	1.03931	0.0556225	0.852639	1.284	0.827	1.0555	0.0779266	1.05211	0.0732828	0.847536
Q71UE8	NEDD8 [OS=Rattus norvegicus]	Q71UE8	0.787	0.7795	0.6985	0.739	-0.436354	0.764	0.8405	0.80225	-0.317876	0.921159	-0.118478	0.373952	0.8085	0.817	0.81275	-0.299116	0.909259	-0.137237	0.211835
B3GNI6-2	Isoform 2 of Septin-11 [OS=Rattus norvegicus]	B3GNI6-2	1.036	1.131	1.1	1.1155	0.157691	1.165	1.009	1.087	0.120352	1.02622	0.0373386	0.754354	1.356	1.079	1.2175	0.283922	0.916222	-0.126231	0.540377
P08699	Galectin-3 [OS=Rattus norvegicus]	P08699	0.983	1.498	1.243	1.3705	0.454702	1.521	1.241	1.381	0.465713	0.992397	-0.011011	0.960821	2.407	1.495	1.951	0.964214	0.70246	-0.509511	0.344962
Q6BBI8	ubiquitin-fold modifier-conjugating enzyme 1 [OS=Rattus norvegicus]	Q6BBI8	0.999	0.773	0.841	0.807	-0.309359	0.982	0.925	0.9535	-0.0686952	0.846356	-0.240664	0.0807546	1.093	0.98	1.0365	0.0517201	0.778582	-0.36108	0.0735625
Q6PEC1	Tubulin-specific chaperone A [OS=Rattus norvegicus]	Q6PEC1	0.921	0.995	0.962	0.9785	-0.0313562	1.05	0.971	1.0105	0.0150693	0.968333	-0.0464256	0.532685	0.945	0.976	0.9605	-0.0581425	1.01874	0.0267862	0.509921
Q4KLM6	Prolyl 3-hydroxylase 2 [OS=Rattus norvegicus]	Q4KLM6	#DIV/0!	#DIV/0!	#DIV/0!	#DIV/0!	#DIV/0!	#DIV/0!	#DIV/0!	#DIV/0!	#DIV/0!	#DIV/0!	#DIV/0!		#DIV/0!	#DIV/0!	#DIV/0!	#DIV/0!	#DIV/0!	#DIV/0!
P50609	Fibromodulin [OS=Rattus norvegicus]	P50609	1.052	0.925	1.1525	1.03875	0.0548485	0.9875	0.904	0.94575	-0.0804692	1.09833	0.135318	0.523003	0.684	0.9085	0.79625	-0.328707	1.30455	0.383555	0.268451
O35828	Coronin-7 [OS=Rattus norvegicus]	O35828	1.163	1.326	1.472	1.399	0.484396	1.281	1.389	1.335	0.41684	1.04794	0.0675562	0.553939	2.245	1.331	1.788	0.838347	0.782438	-0.353951	0.489076
Q68FS4-1	cytosol aminopeptidase [OS=Rattus norvegicus]	Q68FS4-1	0.9765	1.12	1.0375	1.07875	0.109361	1.092	1.0075	1.04975	0.0700458	1.02763	0.0393148	0.671939	0.9815	1.081	1.03125	0.0443941	1.04606	0.0649664	0.538846
P42123	L-lactate dehydrogenase B chain [OS=Rattus norvegicus]	P42123	0.9215	0.971	0.7845	0.87775	-0.188118	1.1255	1.071	1.09825	0.135206	0.799226	-0.323325	0.151273	0.991	1.0145	1.00275	0.00396197	0.875343	-0.19208	0.314924
P48721	Stress-70 protein, mitochondrial [OS=Rattus norvegicus]	P48721	1.064	0.919	0.999	0.959	-0.0603973	0.912	1.097	1.0045	0.00647756	0.954704	-0.0668748	0.695873	1.524	1.079	1.3015	0.380175	0.736842	-0.440573	0.268988
P42676	Neurolysin, mitochondrial [OS=Rattus norvegicus]	P42676	0.942	0.997	1.24	1.1185	0.161565	0.853	1.074	0.9635	-0.0536434	1.16087	0.215209	0.444904	0.992	1.039	1.0155	0.0221902	1.10143	0.139375	0.492789
P62271	40S ribosomal protein S18 [OS=Rattus norvegicus]	P62271	1.4	1.102	2.036	1.569	0.649845	1.718	1.328	1.523	0.606916	1.0302	0.0429294	0.93586	2.274	1.073	1.6735	0.742869	0.937556	-0.0930232	0.903319
P04639	Apolipoprotein A-I [OS=Rattus norvegicus]	P04639	0.984	1.242	1.25	1.246	0.317304	1.298	0.972	1.135	0.182692	1.0978	0.134612	0.566257	1.315	1.059	1.187	0.24732	1.04971	0.0699841	0.690249
P40112	proteasome subunit beta type-3 [OS=Rattus norvegicus]	P40112	0.877	1.164	1.285	1.2245	0.292193	1.442	1.061	1.2515	0.323658	0.978426	-0.0314655	0.904914	1.542	1.023	1.2825	0.358959	0.954776	-0.0667661	0.847876
P15999	ATP synthase subunit alpha, mitochondrial [OS=Rattus norvegicus]	P15999	1.168	1.001	1.064	1.0325	0.0461418	1.06	1.387	1.2235	0.291014	0.84389	-0.244872	0.370052	0.548	1.499	1.0235	0.0335111	1.00879	0.0126307	0.986647
Q5XIR4	Coiled-coil domain-containing protein 33 [OS=Rattus norvegicus]	Q5XIR4	#DIV/0!	#DIV/0!	#DIV/0!	#DIV/0!	#DIV/0!	#DIV/0!	#DIV/0!	#DIV/0!	#DIV/0!	#DIV/0!	#DIV/0!		#DIV/0!	#DIV/0!	#DIV/0!	#DIV/0!	#DIV/0!	#DIV/0!
Q6P7C7	Transmembrane glycoprotein NMB [OS=Rattus norvegicus]	Q6P7C7	0.895	0.899	0.842	0.8705	-0.200084	1.382	1.017	1.1995	0.262433	0.725719	-0.462517	0.21684	2.129	1.374	1.7515	0.808591	0.497003	-1.00867	0.145424
D4A4T9	cysteine and histidine-rich domain-containing protein 1 [OS=Rattus norvegicus]	D4A4T9	1.018	1.032	0.972	1.002	0.00288251	1.077	1.001	1.039	0.0551957	0.964389	-0.0523131	0.524585	1.244	0.925	1.0845	0.11703	0.923928	-0.114148	0.661745
Q9JLJ3	4-trimethylaminobutyraldehyde dehydrogenase [OS=Rattus norvegicus]	Q9JLJ3	0.849	0.996	0.9	0.948	-0.077041	1.004	0.933	0.9685	-0.046176	0.978833	-0.030865	0.764052	1.497	0.984	1.2405	0.310922	0.764208	-0.387963	0.378852
Q64640	Adenosine kinase [OS=Rattus norvegicus]	Q64640	1.176	1.376	1.4	1.388	0.473008	1.234	1.085	1.1595	0.213503	1.19707	0.259505	0.0939439	1.683	1.154	1.4185	0.504366	0.978498	-0.0313586	0.918815
P62836	ras-related protein Rap-1A [OS=Rattus norvegicus]	P62836	0.999	1.051	1.162	1.1065	0.146003	1.046	1.126	1.086	0.119024	1.01888	0.0269793	0.792715	1.549	1.054	1.3015	0.380175	0.850173	-0.234172	0.522394
P17074	40S ribosomal protein S19 [OS=Rattus norvegicus]	P17074	0.928	1.042	1.267	1.1545	0.207268	1.115	0.883	0.999	-0.00144342	1.15566	0.208712	0.437438	1.447	0.981	1.214	0.279768	0.950988	-0.0725002	0.8395
Q8K4F7	M7GpppX diphosphatase [OS=Rattus norvegicus]	Q8K4F7	0.96	0.993	0.976	0.9845	-0.0225369	0.985	1.054	1.0195	0.0278618	0.965669	-0.0503987	0.428452	1.504	1.026	1.265	0.339137	0.778261	-0.361674	0.36162
P06302	Prothymosin alpha [OS=Rattus norvegicus]	P06302	0.912	2.466	1.893	2.1795	1.124	2.031	1.465	1.748	0.805705	1.24685	0.318292	0.396096	3.369	1.558	2.4635	1.30071	0.884717	-0.176712	0.793129
Q9WVK7	Hydroxyacyl-coenzyme A dehydrogenase, mitochondrial [OS=Rattus norvegicus]	Q9WVK7	1.003	0.706	0.777	0.7415	-0.431481	0.719	0.816	0.7675	-0.381761	0.966124	-0.0497201	0.707496	0.71	0.782	0.746	-0.422752	0.993968	-0.00872894	0.937189
P13471	40S ribosomal protein S14 [OS=Rattus norvegicus]	P13471	1.02	1.213	1.58	1.3965	0.481816	1.668	0.961	1.3145	0.394514	1.06238	0.0873014	0.855939	1.56	1.048	1.304	0.382944	1.07094	0.0988717	0.796678
Q62920-1	PDZ and LIM domain protein 5 [OS=Rattus norvegicus]	Q62920-1	0.9475	0.978	0.8045	0.89125	-0.166098	0.9785	1.1795	1.079	0.109695	0.825996	-0.275793	0.292901	1.09	1.125	1.1075	0.147307	0.80474	-0.313405	0.134499
Q66HS7-1	PDZ and LIM domain protein 3 [OS=Rattus norvegicus]	Q66HS7-1	1.091	1.469	1.389	1.429	0.515006	1.297	1.622	1.4595	0.545474	0.979102	-0.0304683	0.872185	1.651	1.546	1.5985	0.676719	0.893963	-0.161713	0.124037
O55096	dipeptidyl peptidase 3 [OS=Rattus norvegicus]	O55096	1.003	1.105	1.585	1.345	0.427606	1.159	1.131	1.145	0.195348	1.17467	0.232259	0.492967	2.203	1.143	1.673	0.742437	0.803945	-0.314831	0.6297
Q8VI04	isoaspartyl peptidase/L-asparaginase [OS=Rattus norvegicus]	Q8VI04	1.514	1.153	1.117	1.135	0.182692	1.357	1.097	1.227	0.295135	0.92502	-0.112443	0.555882	1.55	1.175	1.3625	0.446256	0.833028	-0.263564	0.350574
Q6AYS7	aminoacylase-1A [OS=Rattus norvegicus]	Q6AYS7	1.036	0.836	1.113	0.9745	-0.0372659	1.376	0.875	1.1255	0.170566	0.865837	-0.207832	0.650502	0.616	0.864	0.74	-0.434403	1.31689	0.397137	0.334351
P62716	serine/threonine-protein phosphatase 2A catalytic subunit beta isoform [OS=Rattus norvegicus]	P62716	0.925	0.932	0.998	0.965	-0.0513992	0.929	0.983	0.956	-0.0649175	1.00941	0.0135183	0.85238	1.127	0.953	1.04	0.0565835	0.927885	-0.107983	0.504829
B5DF91	ELAV-like protein 1 [OS=Rattus norvegicus]	B5DF91	1.101	1.301	1.432	1.3665	0.450485	1.397	1.331	1.364	0.447844	1.00183	0.00264182	0.975904	1.887	1.317	1.602	0.679874	0.852996	-0.229389	0.505159
Q62724	DNA replication licensing factor MCM6 [OS=Rattus norvegicus]	Q62724	1.026	0.812	1.081	0.9465	-0.0793256	0.781	1.029	0.905	-0.14401	1.04586	0.0646847	0.841615	0.949	0.846	0.8975	-0.156016	1.0546	0.0766906	0.766098
P12785	Fatty acid synthase [OS=Rattus norvegicus]	P12785	1.447	1.135	1.683	1.409	0.494672	0.899	1.755	1.327	0.408168	1.06179	0.0865032	0.88664	0.976	0.993	0.9845	-0.0225369	1.43118	0.517209	0.261596
Q1JU68	Eukaryotic translation initiation factor 3 subunit A [OS=Rattus norvegicus]	Q1JU68	0.931	1.207	1.2	1.2035	0.267236	1.324	1.144	1.234	0.303342	0.975284	-0.0361063	0.767133	1.231	1.128	1.1795	0.238175	1.02035	0.0290607	0.687679
P14841	Cystatin-C [OS=Rattus norvegicus]	P14841	1.21	1.432	1.665	1.5485	0.630871	1.482	1.477	1.4795	0.56511	1.04664	0.0657617	0.613783	2.548	1.508	2.028	1.02006	0.76356	-0.389186	0.463186
Q64240	Protein AMBP [OS=Rattus norvegicus]	Q64240	1.008	1.374	1.23	1.302	0.380729	1.001	1.104	1.0525	0.0738202	1.23705	0.306909	0.106204	1.743	1.096	1.4195	0.505383	0.917224	-0.124653	0.756828
Q920D2	dihydrofolate reductase [OS=Rattus norvegicus]	Q920D2	0.929	0.988	0.942	0.965	-0.0513992	1.225	0.96	1.0925	0.127633	0.883295	-0.179032	0.443156	1.148	0.895	1.0215	0.0306892	0.944689	-0.0820884	0.703267
P26051	CD44 antigen [OS=Rattus norvegicus]	P26051	1.449	1.582	1.399	1.4905	0.575796	1.008	1.2	1.104	0.14274	1.35009	0.433056	0.100332	1.766	1.38	1.573	0.653519	0.947552	-0.0777223	0.736529
F1LQ48	Heterogeneous nuclear ribonucleoprotein L [OS=Rattus norvegicus]	F1LQ48	1.035	1.169	1.176	1.1725	0.229588	1.208	1.153	1.1805	0.239398	0.993223	-0.00981012	0.800062	1.763	1.146	1.4545	0.540523	0.806119	-0.310935	0.457183
Q6IRK9	Carboxypeptidase Q [OS=Rattus norvegicus]	Q6IRK9	1.085	1.426	1.687	1.5565	0.638306	1.247	1.417	1.332	0.413594	1.16854	0.224711	0.28617	2.101	1.327	1.714	0.777367	0.90811	-0.139062	0.736916
P81718	tyrosine-protein phosphatase non-receptor type 6 [OS=Rattus norvegicus]	P81718	1.083	0.995	0.92	0.9575	-0.0626556	1.035	0.94	0.9875	-0.0181473	0.96962	-0.0445083	0.669209	1.209	1.092	1.1505	0.202261	0.832247	-0.264917	0.108866
P97697	Inositol monophosphatase 1 [OS=Rattus norvegicus]	P97697	1.111	1.229	1.111	1.17	0.226509	1.111	1.243	1.177	0.235114	0.994053	-0.00860579	0.944175	1.862	1.21	1.536	0.619178	0.761719	-0.39267	0.384391
P16303	Carboxylesterase 1D [OS=Rattus norvegicus]	P16303	1.102	0.9015	1.0275	0.9645	-0.0521469	1.009	1.137	1.073	0.10165	0.898882	-0.153797	0.350454	0.9255	1.022	0.97375	-0.0383767	0.990501	-0.0137702	0.917854
P63159	High mobility group protein B1 [OS=Rattus norvegicus]	P63159	1.026	1.444	1.271	1.3575	0.440952	1.263	1.358	1.3105	0.390117	1.03586	0.0508348	0.68084	1.699	0.962	1.3305	0.411969	1.02029	0.0289837	0.949625
P01041	Cystatin-B [OS=Rattus norvegicus]	P01041	0.803	1.273	1.101	1.187	0.24732	1.342	1.177	1.2595	0.332851	0.942437	-0.0855312	0.604837	2.109	1.198	1.6535	0.725523	0.717871	-0.478203	0.420206
Q4KLF8	Actin-related protein 2/3 complex subunit 5 [OS=Rattus norvegicus]	Q4KLF8	1.109	1.562	1.604	1.583	0.662661	1.571	1.41	1.4905	0.575796	1.06206	0.0868649	0.381941	1.658	1.71	1.684	0.751892	0.940024	-0.0892309	0.0942706
Q6IFV3	Keratin, type I cytoskeletal 15 [OS=Rattus norvegicus]	Q6IFV3	0.348	0.508	0.537	0.5225	-0.936497	0.612	0.473	0.5425	-0.882305	0.963134	-0.0541921	0.804643	0.488	0.909	0.6985	-0.517668	0.748031	-0.418829	0.491968
Q62658	Peptidyl-prolyl cis-trans isomerase FKBP1A [OS=Rattus norvegicus]	Q62658	1.114	1.209	1.398	1.3035	0.382391	1.129	1.264	1.1965	0.25882	1.08943	0.12357	0.454124	1.86	1.319	1.5895	0.668573	0.820069	-0.286182	0.423365
P05982	NAD(P)H dehydrogenase [quinone] 1 [OS=Rattus norvegicus]	P05982	1.025	0.93	1.119	1.0245	0.03492	1.231	1.091	1.161	0.215368	0.882429	-0.180448	0.365581	1.109	1.146	1.1275	0.173127	0.908647	-0.138207	0.396763
Q4KM35	Proteasome subunit beta type-10 [OS=Rattus norvegicus]	Q4KM35	0.959	1.083	1.153	1.118	0.16092	1.274	0.992	1.133	0.180148	0.986761	-0.0192277	0.927185	1.145	1.119	1.132	0.178874	0.987633	-0.0179538	0.743712
Q5XIM9	T-complex protein 1 subunit beta [OS=Rattus norvegicus]	Q5XIM9	0.956	0.792	0.79	0.791	-0.33825	0.913	0.878	0.8955	-0.159235	0.883305	-0.179016	0.0270014	0.973	0.837	0.905	-0.14401	0.874033	-0.19424	0.235674
Q921A4	Cytoglobin [OS=Rattus norvegicus]	Q921A4	0.802	0.8655	0.8295	0.8475	-0.238715	0.984	0.924	0.954	-0.0679388	0.888365	-0.170776	0.0930914	1.3	0.9765	1.13825	0.186817	0.744564	-0.425532	0.215933
P46844	Biliverdin reductase A [OS=Rattus norvegicus]	P46844	0.995	1.076	1.03	1.053	0.0745054	1.274	1.1	1.187	0.24732	0.88711	-0.172814	0.274902	0.979	1.091	1.035	0.0496308	1.01739	0.0248747	0.794255
P84817-2	Isoform 2 of Mitochondrial fission 1 protein [OS=Rattus norvegicus]	P84817-2	1.073	1.321	1.224	1.2725	0.347666	1.225	1.049	1.137	0.185232	1.11917	0.162433	0.309901	2.504	1.079	1.7915	0.841168	0.710299	-0.493502	0.542936
Q91Y78	Ubiquitin carboxyl-terminal hydrolase isozyme L3 [OS=Rattus norvegicus]	Q91Y78	1.045	0.884	0.8245	0.85425	-0.22727	0.9195	1.0025	0.961	-0.0573917	0.888918	-0.169878	0.171713	1.003	0.92	0.9615	-0.0566412	0.888456	-0.170629	0.170501
Q63617	Hypoxia up-regulated protein 1 [OS=Rattus norvegicus]	Q63617	0.9815	1.1725	1.148	1.16025	0.214436	1.0925	1.1065	1.0995	0.136848	1.05525	0.0775881	0.0499328	1.7155	1.184	1.44975	0.535804	0.80031	-0.321368	0.390163
P18420	Proteasome subunit alpha type-1 [OS=Rattus norvegicus]	P18420	0.886	1.262	1.449	1.3555	0.438825	1.572	1.09	1.331	0.412511	1.01841	0.0263145	0.933133	2.04	1.228	1.634	0.708408	0.829559	-0.269583	0.572659
P19132	Ferritin heavy chain [OS=Rattus norvegicus]	P19132	1.522	2.811	1.349	2.08	1.05658	1.172	1.023	1.0975	0.134221	1.89522	0.922363	0.312975	1.775	1.126	1.4505	0.53655	1.43399	0.520033	0.513692
O35783	Calumenin [OS=Rattus norvegicus]	O35783	0.935	0.834	0.656	0.745	-0.424688	0.761	0.792	0.7765	-0.364942	0.959433	-0.0597455	0.760612	0.742	0.9585	0.85025	-0.234041	0.876213	-0.190647	0.530973
P41123	60S ribosomal protein L13 [OS=Rattus norvegicus]	P41123	1.047	1.203	1.821	1.512	0.596458	1.348	1.179	1.2635	0.337426	1.19668	0.259032	0.519078	2.202	1.254	1.728	0.789103	0.875	-0.192645	0.739394
P70583	Deoxyuridine 5'-triphosphate nucleotidohydrolase [OS=Rattus norvegicus]	P70583	0.956	0.867	0.862	0.8645	-0.210062	0.944	0.906	0.925	-0.112475	0.934595	-0.0975874	0.0873836	0.884	0.854	0.869	-0.202572	0.994822	-0.00749021	0.79519
P62959	Histidine triad nucleotide-binding protein 1 [OS=Rattus norvegicus]	P62959	1.05	1.058	1.158	1.108	0.147958	1.04	1.075	1.0575	0.0806577	1.04775	0.0673002	0.44105	1.604	1.074	1.339	0.421156	0.827483	-0.273198	0.481926
P62703	40S ribosomal protein S4, X isoform [OS=Rattus norvegicus]	P62703	1.076	1.192	1.459	1.3255	0.406537	1.446	1.055	1.2505	0.322505	1.05998	0.0840316	0.781398	1.744	0.939	1.3415	0.423847	0.988073	-0.0173104	0.97333
Q6QGW5	Steroid receptor RNA activator 1 [OS=Rattus norvegicus]	Q6QGW5	0.765	1.211	1.467	1.339	0.421156	1.121	0.923	1.022	0.0313952	1.31018	0.389761	0.1892	1.446	1.054	1.25	0.321928	1.0712	0.0992279	0.740384
P50878	60S ribosomal protein L4 [OS=Rattus norvegicus]	P50878	1.191	1.142	1.195	1.1685	0.224658	0.97	0.928	0.949	-0.07552	1.2313	0.300178	0.0229161	1.376	0.916	1.146	0.196607	1.01963	0.0280507	0.931443
P51635	alcohol dehydrogenase [NADP(+)] [OS=Rattus norvegicus]	P51635	1.031	1.233	1.2075	1.22025	0.287177	1.1335	1.21	1.17175	0.228665	1.04139	0.058512	0.352094	1.4785	1.326	1.40225	0.487744	0.870209	-0.200567	0.142779
O89049	Thioredoxin reductase 1, cytoplasmic [OS=Rattus norvegicus]	O89049	1.0765	1.132	1.1855	1.15875	0.212569	1.1235	1.0855	1.1045	0.143393	1.04912	0.0691759	0.240064	1.143	1.196	1.1695	0.225892	0.990808	-0.0133225	0.802116
Q9WVC0	Septin-7 [OS=Rattus norvegicus]	Q9WVC0	0.979	1.186	1.195	1.1905	0.251568	1.129	1.012	1.0705	0.0982848	1.1121	0.153283	0.177484	1.394	1.021	1.2075	0.272023	0.985921	-0.0204556	0.935697
P45479	Palmitoyl-protein thioesterase 1 [OS=Rattus norvegicus]	P45479	0.806	0.794	0.775	0.7845	-0.350155	0.734	0.831	0.7825	-0.353837	1.00256	0.0036827	0.971396	1.258	0.808	1.033	0.0468403	0.759439	-0.396995	0.384838
Q99068	alpha-2-macroglobulin receptor-associated protein [OS=Rattus norvegicus]	Q99068	1.108	1.017	1.068	1.0425	0.0600474	1.018	1.027	1.0225	0.0321008	1.01956	0.0279465	0.520674	1.326	1.083	1.2045	0.268434	0.865504	-0.208387	0.321867
P09034	Argininosuccinate synthase [OS=Rattus norvegicus]	P09034	0.974	1.141	0.891	1.016	0.0229004	1.029	1.053	1.041	0.0579701	0.975985	-0.0350697	0.8606	1.246	1.008	1.127	0.172488	0.901508	-0.149587	0.58602
P63324	40S ribosomal protein S12 [OS=Rattus norvegicus]	P63324	1.102	1.418	1.6	1.509	0.593593	1.202	1.15	1.176	0.233888	1.28316	0.359705	0.0721426	1.887	1.168	1.5275	0.611172	0.987889	-0.0175796	0.964747
P05371	Clusterin [OS=Rattus norvegicus]	P05371	0.957	1.466	1.719	1.5925	0.671293	1.232	1.281	1.2565	0.329411	1.26741	0.341883	0.120952	2.047	1.075	1.561	0.642471	1.02018	0.0288228	0.95569
P62893	60S ribosomal protein L39 [OS=Rattus norvegicus]	P62893	1.021	0.907	1.008	0.9575	-0.0626556	0.984	0.907	0.9455	-0.0808506	1.01269	0.018195	0.867555	1.072	0.881	0.9765	-0.0343081	0.980543	-0.0283476	0.876587
Q8R511-2	Isoform 2 of Formin-binding protein 1 [OS=Rattus norvegicus]	Q8R511-2	0.953	0.805	0.915	0.86	-0.217591	1.058	0.997	1.0275	0.0391384	0.836983	-0.25673	0.11679	1.129	0.94	1.0345	0.0489336	0.831319	-0.266525	0.251567
Q9EPH1	Alpha-1B-glycoprotein [OS=Rattus norvegicus]	Q9EPH1	1.109	0.426	0.406	0.416	-1.26534	0.634	0.733	0.6835	-0.548987	0.608632	-0.716358	0.033841	0.524	0.343	0.4335	-1.2059	0.959631	-0.0594485	0.865332
P23965	Enoyl-CoA delta isomerase 1, mitochondrial [OS=Rattus norvegicus]	P23965	1.363	1.605	1.683	1.644	0.71721	1.256	1.222	1.239	0.309176	1.32688	0.408034	0.0108555	1.621	1.098	1.3595	0.443076	1.20927	0.274134	0.394471
P05942	Protein S100-A4 [OS=Rattus norvegicus]	P05942	0.977	1.425	1.871	1.648	0.720716	1.549	1.409	1.479	0.564622	1.11427	0.156094	0.544769	1.397	1.369	1.383	0.467801	1.19161	0.252915	0.357422
Q8VIF7	Selenium-binding protein 1 [OS=Rattus norvegicus]	Q8VIF7	0.966	0.88	0.774	0.827	-0.274041	0.943	0.828	0.8855	-0.175436	0.933936	-0.098605	0.532415	0.846	0.895	0.8705	-0.200084	0.950029	-0.073957	0.533919
O70593	Small glutamine-rich tetratricopeptide repeat-containing protein alpha [OS=Rattus norvegicus]	O70593	0.961	1.308	1.33	1.319	0.399445	1.055	1.221	1.138	0.186501	1.15905	0.212944	0.163157	1.029	1.254	1.1415	0.190931	1.1555	0.208514	0.25693
P18421	proteasome subunit beta type-1 [OS=Rattus norvegicus]	P18421	#DIV/0!	#DIV/0!	#DIV/0!	#DIV/0!	#DIV/0!	#DIV/0!	#DIV/0!	#DIV/0!	#DIV/0!	#DIV/0!	#DIV/0!		#DIV/0!	#DIV/0!	#DIV/0!	#DIV/0!	#DIV/0!	#DIV/0!
Q5U318	Astrocytic phosphoprotein PEA-15 [OS=Rattus norvegicus]	Q5U318	0.782	0.97	0.893	0.9315	-0.102372	1.044	0.9	0.972	-0.0409718	0.958333	-0.0614005	0.669018	1.214	0.994	1.104	0.14274	0.84375	-0.245112	0.276974
P62919	60S ribosomal protein L8 [OS=Rattus norvegicus]	P62919	1.136	1.551	1.948	1.7495	0.806943	1.597	1.506	1.5515	0.633664	1.12762	0.173279	0.433473	2.203	1.313	1.758	0.813935	0.995165	-0.00699241	0.987666
Q6NYB7	Ras-related protein Rab-1A [OS=Rattus norvegicus]	Q6NYB7	0.923	0.958	0.908	0.933	-0.100051	0.859	1.053	0.956	-0.0649175	0.975941	-0.0351335	0.83974	1.451	1.031	1.241	0.311503	0.751813	-0.411554	0.282583
B0BNE5	S-formylglutathione hydrolase [OS=Rattus norvegicus]	B0BNE5	0.965	0.678	0.68	0.679	-0.558517	0.821	0.649	0.735	-0.444184	0.92381	-0.114333	0.581787	0.316	0.792	0.554	-0.852042	1.22563	0.293526	0.651857
P51111	huntingtin [OS=Rattus norvegicus]	P51111	0.905	1.012	0.901	0.9565	-0.0641631	1.006	0.891	0.9485	-0.0762803	1.00843	0.0121172	0.929391	0.864	0.932	0.898	-0.155213	1.06514	0.0910495	0.463613
Q01205	Dihydrolipoyllysine-residue succinyltransferase component of 2-oxoglutarate dehydrogenase complex, mitochondrial [OS=Rattus norvegicus]	Q01205	1.067	0.988	1.017	1.0025	0.00360224	0.984	1.136	1.06	0.0840643	0.945755	-0.080462	0.534817	1.492	1.332	1.412	0.49774	0.709986	-0.494138	0.0372318
Q642C0	DnaJ homolog subfamily C member 8 [OS=Rattus norvegicus]	Q642C0	0.963	0.889	0.853	0.871	-0.199255	0.896	0.918	0.907	-0.140826	0.960309	-0.0584298	0.230024	1.02	0.905	0.9625	-0.0551416	0.904935	-0.144114	0.268181
Q62733	lamina-associated polypeptide 2, isoform beta [OS=Rattus norvegicus]	Q62733	0.848	1.018	1.059	1.0385	0.0545012	1.04	0.941	0.9905	-0.0137711	1.04846	0.0682723	0.464847	1.136	0.882	1.009	0.0129262	1.02924	0.041575	0.83994
P06760	beta-glucuronidase [OS=Rattus norvegicus]	P06760	1.188	1.232	1.531	1.3815	0.466236	1.41	1.231	1.3205	0.401084	1.04619	0.0651513	0.759705	2.232	1.363	1.7975	0.845992	0.768567	-0.379756	0.460847
P47967	galectin-5 [OS=Rattus norvegicus]	P47967	1.135	0.71	0.862	0.786	-0.347399	0.99	0.77	0.88	-0.184425	0.893182	-0.162974	0.554837	0.736	0.674	0.705	-0.504305	1.11489	0.156906	0.427744
Q9Z339	Glutathione S-transferase omega-1 [OS=Rattus norvegicus]	Q9Z339	0.94	0.808	0.712	0.76	-0.395929	1.078	0.826	0.952	-0.0709665	0.798319	-0.324962	0.290464	0.824	1.032	0.928	-0.107803	0.818966	-0.288125	0.280129
P63326	40S ribosomal protein S10 [OS=Rattus norvegicus]	P63326	0.936	1.226	1.354	1.29	0.367371	1.427	1.032	1.2295	0.298072	1.04921	0.0692993	0.798182	1.998	1.041	1.5195	0.603597	0.848963	-0.236226	0.681369
P32577	tyrosine-protein kinase CSK [OS=Rattus norvegicus]	P32577	1.011	1.184	1.348	1.266	0.340277	1.254	1.063	1.1585	0.212258	1.09279	0.128019	0.483058	1.688	1.09	1.389	0.474047	0.911447	-0.133769	0.729901
P13084	Nucleophosmin [OS=Rattus norvegicus]	P13084	1.183	1.685	2.753	2.219	1.14991	1.433	1.103	1.268	0.342555	1.75	0.807355	0.230952	2.378	1.406	1.892	0.919912	1.17283	0.229998	0.695022
Q9ESW0	DNA damage-binding protein 1 [OS=Rattus norvegicus]	Q9ESW0	0.883	1.017	1.045	1.031	0.0440443	1.156	1.012	1.084	0.116365	0.951107	-0.0723204	0.54501	1.411	0.931	1.171	0.227741	0.880444	-0.183697	0.619239
P38650	Cytoplasmic dynein 1 heavy chain 1 [OS=Rattus norvegicus]	P38650	0.986	1.242	1.217	1.2295	0.298072	1.171	1.119	1.145	0.195348	1.0738	0.102724	0.09947	2.04	1.334	1.687	0.75446	0.728809	-0.456388	0.324599
E9PU28	inosine-5'-monophosphate dehydrogenase 2 [OS=Rattus norvegicus]	E9PU28	0.782	0.637	0.903	0.77	-0.37707	1.122	0.737	0.9295	-0.105473	0.828402	-0.271596	0.565785	0.95	1.155	1.0525	0.0738202	0.731591	-0.45089	0.234518
Q3T1K5	F-actin-capping protein subunit alpha-2 [OS=Rattus norvegicus]	Q3T1K5	0.817	0.926	0.949	0.9375	-0.0931094	0.984	0.826	0.905	-0.14401	1.03591	0.0509009	0.723369	1.333	0.818	1.0755	0.105008	0.871688	-0.198117	0.645945
P97571	Calpain-1 catalytic subunit [OS=Rattus norvegicus]	P97571	0.961	1.058	1.044	1.051	0.0717627	1.008	1.171	1.0895	0.123666	0.964663	-0.0519035	0.684222	0.936	1.039	0.9875	-0.0181473	1.0643	0.08991	0.346255
Q6RUV5	Ras-related C3 botulinum toxin substrate 1 [OS=Rattus norvegicus]	Q6RUV5	0.859	1.026	1.003	1.0145	0.0207689	0.945	0.859	0.902	-0.148801	1.12472	0.16957	0.127323	1.42	0.977	1.1985	0.26123	0.846475	-0.240461	0.494026
O08835	Synaptotagmin-11 [OS=Rattus norvegicus]	O08835	#DIV/0!	#DIV/0!	#DIV/0!	#DIV/0!	#DIV/0!	#DIV/0!	#DIV/0!	#DIV/0!	#DIV/0!	#DIV/0!	#DIV/0!		#DIV/0!	#DIV/0!	#DIV/0!	#DIV/0!	#DIV/0!	#DIV/0!
Q6P686	osteoclast-stimulating factor 1 [OS=Rattus norvegicus]	Q6P686	0.906	1.551	1.686	1.6185	0.694657	1.541	1.333	1.437	0.52306	1.1263	0.171597	0.280796	2.863	1.241	2.052	1.03703	0.788743	-0.342373	0.647512
P11530	Dystrophin [OS=Rattus norvegicus]	P11530	1.024	0.901	0.901	0.901	-0.150401	1.031	0.9	0.9655	-0.0506518	0.933195	-0.0997492	0.428571	0.897	1.052	0.9745	-0.0372659	0.924577	-0.113135	0.443034
P27952	40S ribosomal protein S2 [OS=Rattus norvegicus]	P27952	1.128	1.388	1.706	1.547	0.629473	1.284	1.256	1.27	0.344828	1.21811	0.284645	0.224801	2.087	1.166	1.6265	0.701771	0.951122	-0.0722976	0.885371
B2RYG6	Ubiquitin thioesterase otub1 [OS=Rattus norvegicus]	B2RYG6	1.025	1.701	1.687	1.694	0.760434	1.555	1.507	1.531	0.614474	1.10647	0.14596	0.0227249	1.915	1.483	1.699	0.764686	0.997057	-0.00425198	0.983643
Q6Q0N1	cytosolic non-specific dipeptidase [OS=Rattus norvegicus]	Q6Q0N1	0.858	0.836	0.781	0.8085	-0.30668	0.847	0.831	0.839	-0.253257	0.963647	-0.053423	0.398453	1.253	1.069	1.161	0.215368	0.696382	-0.522048	0.0668487
P23764	Glutathione peroxidase 3 [OS=Rattus norvegicus]	P23764	1.011	1.099	0.934	1.0165	0.0236102	0.87	0.992	0.931	-0.103147	1.09184	0.126757	0.492336	1.274	0.98	1.127	0.172488	0.901952	-0.148877	0.579458
P02466	Collagen alpha-2(I) chain [OS=Rattus norvegicus]	P02466	0.981	1.096	0.935	1.0155	0.0221902	0.717	0.771	0.744	-0.426625	1.36492	0.448816	0.0854528	0.655	0.934	0.7945	-0.331881	1.27816	0.354071	0.303646
P48679-1	Prelamin-A/C [OS=Rattus norvegicus]	P48679-1	1.541	1.041	1.064	1.0525	0.0738202	1.41	1.197	1.3035	0.382391	0.807442	-0.30857	0.143848	1.172	1.265	1.2185	0.285106	0.863767	-0.211286	0.0741271
Q5XIB2	Peptidyl-prolyl cis-trans isomerase CWC27 homolog [OS=Rattus norvegicus]	Q5XIB2	1.044	1.002	0.937	0.9695	-0.0446872	1.001	0.97	0.9855	-0.0210722	0.983765	-0.023615	0.70024	1.193	0.932	1.0625	0.0874628	0.912471	-0.13215	0.560724
Q01717	Thyrotropin-releasing hormone receptor [OS=Rattus norvegicus]	Q01717	2.617	1.05	1.213	1.1315	0.178237	1.465	1.104	1.2845	0.361207	0.880888	-0.18297	0.520595	1.074	0.932	1.003	0.00432161	1.12812	0.173915	0.356524
P12001	60S ribosomal protein L18 [OS=Rattus norvegicus]	P12001	1.017	1.14	1.173	1.1565	0.209765	1.206	1.065	1.1355	0.183328	1.01849	0.0264376	0.799096	1.475	1.112	1.2935	0.37128	0.894086	-0.161515	0.53064
Q9WUH4	Four and a half LIM domains protein 1 [OS=Rattus norvegicus]	Q9WUH4	1.041	1.045	1.169	1.107	0.146655	1.677	1.269	1.473	0.558757	0.751527	-0.412102	0.228192	1.532	1.487	1.5095	0.594071	0.733355	-0.447416	0.025817
P59215	Guanine nucleotide-binding protein G(O) subunit alpha [OS=Rattus norvegicus]	P59215	#DIV/0!	#DIV/0!	#DIV/0!	#DIV/0!	#DIV/0!	#DIV/0!	#DIV/0!	#DIV/0!	#DIV/0!	#DIV/0!	#DIV/0!		#DIV/0!	#DIV/0!	#DIV/0!	#DIV/0!	#DIV/0!	#DIV/0!
P63088-2	Isoform Gamma-2 of Serine/threonine-protein phosphatase PP1-gamma catalytic subunit [OS=Rattus norvegicus]	P63088-2	0.934	1.062	2.418	1.74	0.799087	1.183	2.606	1.8945	0.921817	0.918448	-0.12273	0.889522	2.151	1.502	1.8265	0.869082	0.952642	-0.0699944	0.918895
O09175	aminopeptidase B [OS=Rattus norvegicus]	O09175	0.945	1.017	1.03	1.0235	0.0335111	0.992	0.921	0.9565	-0.0641631	1.07005	0.0976742	0.20452	1.034	0.927	0.9805	-0.0284105	1.04386	0.0619216	0.508628
O35952-1	Hydroxyacylglutathione hydrolase, mitochondrial [OS=Rattus norvegicus]	O35952-1	1.122	1.1	1.092	1.096	0.132248	1.134	1.13	1.132	0.178874	0.968198	-0.0466262	0.0150838	1.079	0.934	1.0065	0.00934717	1.08892	0.122901	0.342954
Q27W02	Protein mago nashi homolog [OS=Rattus norvegicus]	Q27W02	0.981	0.903	0.954	0.9285	-0.107026	1.002	0.947	0.9745	-0.0372659	0.952796	-0.0697603	0.344793	1.251	1.024	1.1375	0.185867	0.816264	-0.292893	0.21423
P62755	40S RIBOSOMAL PROTEIN S6 [OS=Rattus norvegicus]	P62755	1.594	1.395	1.609	1.502	0.586885	1.733	1.562	1.6475	0.720278	0.911684	-0.133394	0.3994	2.772	1.58	2.176	1.12168	0.690257	-0.534794	0.381523
P18596-1	Sarcoplasmic/endoplasmic reticulum calcium atpase 3 [OS=Rattus norvegicus]	P18596-1	1.001	1.064	1.075	1.0695	0.0969365	1.128	1.064	1.096	0.132248	0.975821	-0.0353113	0.500156	1.49	1.036	1.263	0.336855	0.846793	-0.239918	0.483882
P13803	Electron transfer flavoprotein subunit alpha, mitochondrial [OS=Rattus norvegicus]	P13803	1.026	1.027	0.962	0.9945	-0.00795672	0.932	1.052	0.992	-0.011588	1.00252	0.00363125	0.974102	1.341	1.092	1.2165	0.282736	0.817509	-0.290693	0.226612
P85970	Actin-related protein 2/3 complex subunit 2 [OS=Rattus norvegicus]	P85970	1.211	0.989	0.946	0.9675	-0.0476664	0.952	1.052	1.002	0.00288251	0.965569	-0.0505489	0.590985	1.381	1.12	1.2505	0.322505	0.773691	-0.370171	0.165747
P97541	Heat shock protein beta-6 [OS=Rattus norvegicus]	P97541	1.154	0.875	0.838	0.8565	-0.223475	0.865	0.884	0.8745	-0.19347	0.979417	-0.0300051	0.477987	0.911	0.958	0.9345	-0.0977334	0.916533	-0.125741	0.120928
P54001	prolyl 4-hydroxylase subunit alpha-1 [OS=Rattus norvegicus]	P54001	0.936	1.133	1.358	1.2455	0.316725	1.163	0.967	1.065	0.0908534	1.16948	0.225872	0.349948	1.394	1.067	1.2305	0.299245	1.01219	0.0174804	0.946633
O35814	stress-induced-phosphoprotein 1 [OS=Rattus norvegicus]	O35814	0.931	0.951	0.883	0.917	-0.125006	1.003	0.854	0.9285	-0.107026	0.987614	-0.0179802	0.901187	0.992	1.026	1.009	0.0129262	0.908821	-0.137933	0.136597
Q5I0D7	xaa-Pro dipeptidase [OS=Rattus norvegicus]	Q5I0D7	0.882	0.946	0.923	0.9345	-0.0977334	1.096	0.953	1.0245	0.03492	0.912152	-0.132653	0.339893	1.228	0.861	1.0445	0.0628125	0.894686	-0.160546	0.610382
Q62829	Serine/threonine-protein kinase PAK 3 [OS=Rattus norvegicus]	Q62829	0.856	1.739	1.734	1.7365	0.796182	1.626	1.438	1.532	0.615416	1.13349	0.180766	0.161665	2.884	1.745	2.3145	1.2107	0.75027	-0.414518	0.416951
P13437	3-ketoacyl-CoA thiolase, mitochondrial [OS=Rattus norvegicus]	P13437	0.944	0.64	0.656	0.648	-0.625934	0.755	0.722	0.7385	-0.43733	0.877454	-0.188604	0.0386881	0.853	0.766	0.8095	-0.304897	0.800494	-0.321037	0.0674977
P85971	6-phosphogluconolactonase [OS=Rattus norvegicus]	P85971	0.979	1.218	1.374	1.296	0.374066	1.173	1.212	1.1925	0.253989	1.08679	0.120076	0.326853	1.714	1.279	1.4965	0.581592	0.866021	-0.207527	0.477021
P56571	ES1 protein homolog, mitochondrial [OS=Rattus norvegicus]	P56571	1.271	0.869	0.647	0.758	-0.39973	0.735	0.703	0.719	-0.475936	1.05424	0.0762061	0.761212	0.746	0.753	0.7495	-0.416	1.01134	0.0162694	0.945958
P08461	Dihydrolipoyllysine-residue acetyltransferase component of pyruvate dehydrogenase complex, mitochondrial [OS=Rattus norvegicus]	P08461	0.964	0.887	1.073	0.98	-0.0291463	0.963	1.025	0.994	-0.00868224	0.985915	-0.0204641	0.899527	1.298	1.155	1.2265	0.294547	0.799022	-0.323694	0.17039
